# Supplementary material for: Construction of aromatic-ring-layered structures using a terphenylene-layered polymer as the scaffold
Source: Royal Society of Chemistry journal article supplement (doi:10.1039/c3py00607g), 2013-01-01
Supplement: c3py00607g.pdf [file c3py00607g.pdf]

## *Supporting information*

### **Construction of Aromatic-Ring-Layered Structures Using the Terphenylene-layered Polymer as the Scaffold**

Yuichi Tsuji, Yasuhiro Morisaki,\* and Yoshiki Chujo\*

Department of Polymer Chemistry, Graduate School of Engineering, Kyoto University  
Katsura, Nishikyo-ku, Kyoto 615-8510, Japan

E-mail: ymo@chujo.synchem.kyoto-u.ac.jp (Y. Morisaki)

chujo@chujo.synchem.kyoto-u.ac.jp (Y. Chujo)

| <b>Contents</b>                                                                                                                                                | <b>page</b> |
|----------------------------------------------------------------------------------------------------------------------------------------------------------------|-------------|
| Synthesis of <b>1</b> , <b>M1</b> , <b>M2d</b> , and <b>D2d</b>                                                                                                | S–1         |
| <sup>1</sup> H and <sup>13</sup> C NMR spectra of <b>S1–S3</b> , <b>1</b> , <b>M1</b> , <b>D1</b> , <b>P1</b> , <b>D2d</b> , and <b>P2a–e</b> (Figures S1–S26) | S–6         |
| FT-IR spectra of <b>P1</b> and <b>P2a–e</b> (Figure S27)                                                                                                       | S–19        |
| MALDI-TOF-Mass spectra of <b>P1</b> and <b>P2d</b> (Figures S28 and S29)                                                                                       | S–19        |
| UV-vis absorption and fluorescence spectra of <b>M1</b> , <b>D1</b> and <b>P1</b> (Figure S30)                                                                 | S–20        |
| X-ray diffraction analysis (XRD) patterns of <b>D1</b> , <b>P1</b> , <b>D2d</b> and <b>P2d</b> (Figure S31 and Table S1)                                       | S–21        |
| Fluorescence emission spectra of <b>D2d</b> and <b>P2d</b> in different concentrations (Figure S32)                                                            | S–22        |
| Fluorescence decay analysis of <b>M2d</b> , <b>D2d</b> , and <b>P2d</b> (Figures S33–S35 and Table S2)                                                         | S–23        |
| Fluorescence emission spectra of <b>P2d</b> in 2-methyltetrahydrofuran (Figures S36 and S37)                                                                   | S–25        |

## Synthesis of monomer 1

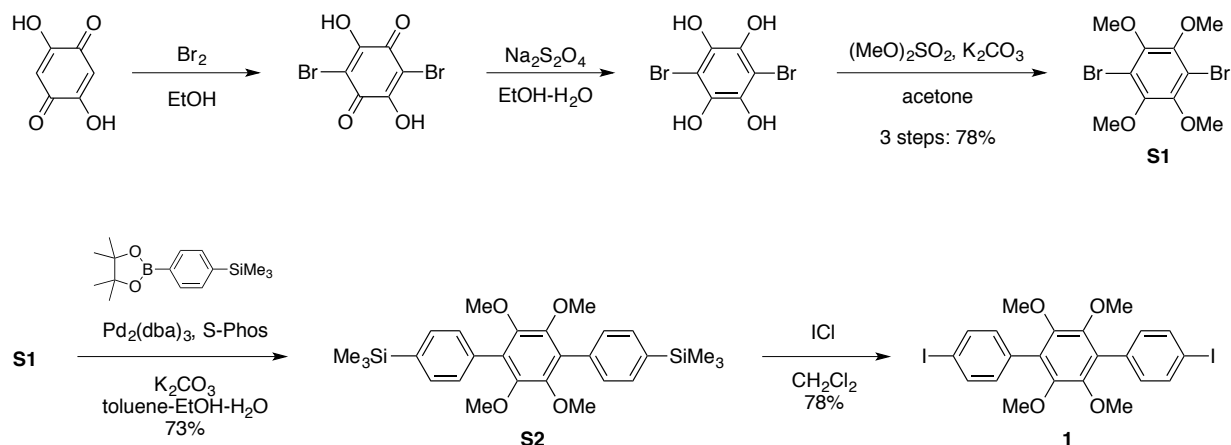

### 1,4-Dibromo-2,3,5,6-tetramethoxybenzene (S1).

1,4-Dihydroxy-*p*-benzoquinone (7.79 g, 55.6 mmol) was suspended in EtOH (200 mL), and  $\text{Br}_2$  (5.66 mL, 111.2 mmol) was added dropwise to the suspension. The mixture was stirred at room temperature overnight. Red precipitation was formed, which was collected by filtration. The crude product was washed with  $\text{CHCl}_3$ , and then, it was dried in vacuo. The product was dissolved in EtOAc (400 mL). Aqueous  $\text{Na}_2\text{S}_2\text{O}_4$  (1 M, 200 mL) was added dropwise to the solution, and the mixture was stirred at room temperature overnight. The organic layer was extracted with EtOAc (100 mL  $\times$  2), and the combined organic layer was dried over  $\text{Na}_2\text{SO}_4$ . After  $\text{Na}_2\text{SO}_4$  was removed, the solution was concentrated in vacuo. The crude product was dissolved in acetone (50 mL).  $(\text{MeO})_2\text{SO}_2$  (21 mL, 222.4 mmol) and  $\text{K}_2\text{CO}_3$  (30.7 g, 222.4 mmol) were added to the solution, and the mixture was refluxed overnight. After cooling to room temperature, the mixture was poured into  $\text{H}_2\text{O}$  (200 mL) to precipitate the product. The precipitation was collected by filtration, and it was dried in vacuo. The crude product was purified by recrystallization from  $\text{CHCl}_3/\text{MeOH}$  to afford S1 as a white crystal (15.51 g, 43.6 mmol, 78% for 3 steps).  $^1\text{H}$  NMR (400 MHz,  $\text{CDCl}_3$ ):  $\delta$  (ppm) 3.88 (s, 12 H).  $^{13}\text{C}$  NMR (100 MHz,  $\text{CDCl}_3$ ):  $\delta$  (ppm) 148.0, 112.9, 61.0.

### 1,4-Bis(4'-trimethylphenyl)-2,3,5,6-tetramethoxybenzene (S2).

A mixture of 4-(4,4,5,5-tetramethyl-1,3,2-dioxaborolan-2-yl)trimethylsilylbenzene (6.63 g, 24.0 mmol), S1 (3.56 g, 10.0 mmol),  $\text{Pd}_2(\text{dba})_3$  (230 mg, 0.25 mmol), 2-dicyclohexylphosphino-2',6'-dimethoxybiphenyl (S-phos) (410 mg, 1.0 mmol), and  $\text{K}_2\text{CO}_3$  (4.15 g, 30.0 mmol) was dissolved in toluene (50 mL), EtOH (20 mL), and  $\text{H}_2\text{O}$  (30 mL). The solution was refluxed for 24 h.  $\text{H}_2\text{O}$  (50

mL) was added, and the organic layer was extracted with  $\text{CHCl}_3$  (30 mL  $\times$  3). The combined organic layer was dried over  $\text{MgSO}_4$ . After removal of  $\text{MgSO}_4$ , the solution was concentrated in vacuo. The crude product was purified by silica gel column chromatography (hexane/ $\text{CHCl}_3$  = 1:1,  $R_f$  = 0.2) and by recrystallization from  $\text{CHCl}_3/\text{MeOH}$  to afford 1,4-bis(4'-trimethylphenyl)-2,3,5,6-tetramethoxybenzene (**S2**) as a white crystal (3.61 g, 7.29 mmol, 73%).  $^1\text{H}$  NMR (400 MHz,  $\text{CDCl}_3$ ):  $\delta$  (ppm) 7.59 (d,  $J$  = 8.0 Hz, 4 H), 7.39 (d,  $J$  = 8.0 Hz, 4 H), 3.62 (s, 12 H), 0.31 (s, 18 H).  $^{13}\text{C}$  NMR (100 MHz,  $\text{CDCl}_3$ ):  $\delta$  (ppm) 147.0, 139.0, 134.3, 132.9, 130.2, 129.3, 60.9, -1.0. MS (APCI)  $m/z$ : 495.2378 (calcd for  $\text{C}_{28}\text{H}_{38}\text{O}_4\text{Si}_2$ ,  $[\text{M} + \text{H}]^+$  495.2381). Anal. calcd. for  $\text{C}_{28}\text{H}_{38}\text{O}_4\text{Si}_2$ : C 67.97, H 7.74; found: C 67.71, H 7.81.

#### **1,4-Bis(4'-iodophenyl)-2,3,5,6-tetramethoxybenzene (1).**

$\text{ICl}$  in  $\text{CH}_2\text{Cl}_2$  solution (1 M, 4 mL) was added dropwise to the solution of **S2** (825 mg, 1.67 mmol) in  $\text{CH}_2\text{Cl}_2$  (20 mL) at room temperature. The mixture was stirred at room temperature overnight to form precipitation. The precipitation was collected by filtration, and it was washed with hexane. The crude product was purified by recrystallization from  $\text{CHCl}_3/\text{MeOH}$  to afford **1** as a white crystal (781 mg, 1.30 mmol, 78%).  $^1\text{H}$  NMR (400 MHz,  $\text{CDCl}_3$ ):  $\delta$  (ppm) 7.77 (d,  $J$  = 8.3 Hz, 4 H), 7.18 (d,  $J$  = 8.3 Hz, 4 H), 3.57 (s, 12 H).  $^{13}\text{C}$  NMR (100 MHz,  $\text{CDCl}_3$ ):  $\delta$  (ppm) 147.2, 137.3, 133.4, 132.5, 129.5, 93.5, 61.2. MS (APCI)  $m/z$ : 602.9519 (calcd for  $\text{C}_{22}\text{H}_{20}\text{O}_4\text{I}_2$ ,  $[\text{M} + \text{H}]^+$  602.9524). Anal. calcd. for  $\text{C}_{22}\text{H}_{20}\text{O}_4\text{I}_2$ : C 43.88, H 3.35, O 10.63, I 42.15; found: C 43.79, H 3.37, O 10.79, I 41.58.

## Synthesis of compound **M1**

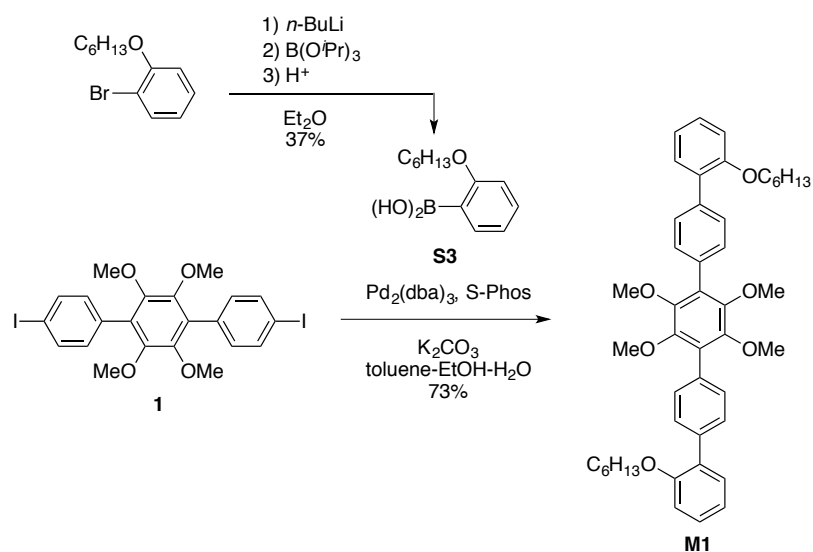

### 2-Hexyloxybenzeneboronic acid (**S3**).

*n*BuLi (24 mL, 1.6 M hexane solution) was added dropwise to a solution of 2-hexyloxybromobenzene (6.2 g, 24 mmol) in Et<sub>2</sub>O (70 mL) at -78 C°. After stirring for 2 h, B(O<sup>*i*</sup>Pr)<sub>3</sub> (9.2 mL, 40 mmol) was added dropwise to the solution at -78 C°, and it was stirred at room temperature overnight. 1 N HCl was added to the solution to quench the reaction, and then, the organic layer was extracted with Et<sub>2</sub>O three times. The organic layer was dried over MgSO<sub>4</sub>. After removal of MgSO<sub>4</sub>, the solution was dried in vacuo. The crude product was purified by recrystallization from CHCl<sub>3</sub>/hexane to afford 2-hexyloxybenzeneboronic acid (**S3**) as a white crystal (1.96 g, 8.8 mmol, 37%). <sup>1</sup>H NMR (400 MHz, DMSO-*d*<sub>6</sub>): δ (ppm) 7.66 (s, 2 H), 7.57 (d, *J* = 7.0 Hz, 1 H), 7.34 (t, *J* = 7.6 Hz, 1 H), 6.96 (d, *J* = 8.5 Hz, 1 H), 6.91 (t, *J* = 7.2 Hz, 1 H), 4.01 (t, *J* = 6.4 Hz, 2 H), 1.73 (m, 2 H), 1.40 (m, 2 H), 1.30 (m, 4 H), 0.86 (t, *J* = 6.4 Hz, 3 H). <sup>13</sup>C NMR (100 MHz, DMSO-*d*<sub>6</sub>): δ (ppm) 162.9, 135.4, 131.6, 120.3, 111.2, 67.7, 34.8, 30.9, 28.6, 25.2, 22.0, 13.9.

### 1,4-Bis([2'-hexyloxy-1,1'-biphenyl]-4-yl)-2,3,5,6-tetramethoxybenzene (**M1**).

A mixture of **1** (150 mg, 0.25 mmol), **S3** (222 mg, 1.0 mmol), Pd<sub>2</sub>(dba)<sub>3</sub> (10 mg, 0.012 mmol), S-Phos (21 mg, 0.05 mmol), and K<sub>2</sub>CO<sub>3</sub> (138 mg, 1.0 mmol) was dissolved in toluene (5 mL), EtOH (2 mL), and H<sub>2</sub>O (3 mL). The solution was refluxed overnight. H<sub>2</sub>O (20 mL) was added to the solution, and the product was extracted with CHCl<sub>3</sub> (20 mL × 3). The organic layer was dried over

MgSO<sub>4</sub>. After removal of MgSO<sub>4</sub>, the solution was concentrated in vacuo. The residue was plugged through short silica gel column (CHCl<sub>3</sub>, *R<sub>f</sub>* = 0.5), and the product was purified by recrystallization from CHCl<sub>3</sub>/MeOH to give **M1** (73%, 129 mg, 0.18 mmol) as a white crystal. <sup>1</sup>H NMR (400 MHz, CDCl<sub>3</sub>): δ (ppm) 7.66 (d, *J* = 8.2 Hz, 4 H), 7.48 (d, *J* = 8.2 Hz, 4 H), 7.44 (d, *J* = 7.6 Hz, 2 H), 7.29 (t, *J* = 7.8 Hz, 2 H), 7.00 (m, 4 H), 3.99 (t, *J* = 6.4 Hz, 4 H), 3.64 (s, 12 H), 1.75 (m, 4 H), 1.43 (m, 4 H), 1.30 (m, 8 H), 0.88 (t, *J* = 6.6 Hz, 6 H). <sup>13</sup>C NMR (100 MHz, CDCl<sub>3</sub>): δ (ppm) 156.1, 147.1, 137.3, 132.1, 130.8, 129.9, 129.6, 129.0, 128.4, 120.7, 112.6, 68.4, 60.9, 31.5, 29.3, 25.8, 22.6, 14.1. MS (APCI) *m/z*: 703.3973 (calcd for C<sub>46</sub>H<sub>54</sub>O<sub>6</sub>, [M + H]<sup>+</sup> 703.3993). Anal. calcd. for C 78.60, H 7.74, O 13.66; found: C 78.65, H 7.81, O 13.89.

### Synthesis of compound **M2d**

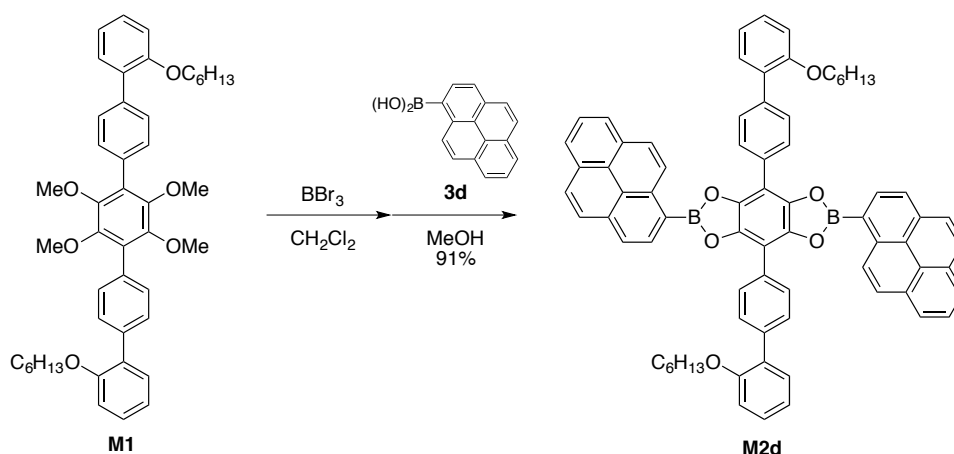

BBr<sub>3</sub> in CH<sub>2</sub>Cl<sub>2</sub> solution (1 M, 0.25 mL) was added dropwise to the solution of **M1** (28 mg, 0.04 mmol) in CH<sub>2</sub>Cl<sub>2</sub>, and the mixture was stirred at room temperature for 2 h. 1-Pyreneboronic acid (**3d**) (0.5 mmol) in CH<sub>2</sub>Cl<sub>2</sub>/MeOH (v/v = 1:1) was added to the solution and stirred overnight. Excess MeOH was added to the mixture to precipitate the product. The precipitation was collected by filtration, and it was washed with MeOH and hexane. The product was dried in vacuo to obtain **M2d** as a white powder (39 mg, 0.036 mmol, 91%). MS (APCI) *m/z*: 1089.4452 (calcd for C<sub>74</sub>H<sub>60</sub>B<sub>2</sub>O<sub>6</sub>, [M + Na]<sup>+</sup> 1089.4468).

### Synthesis of compound **D2d**

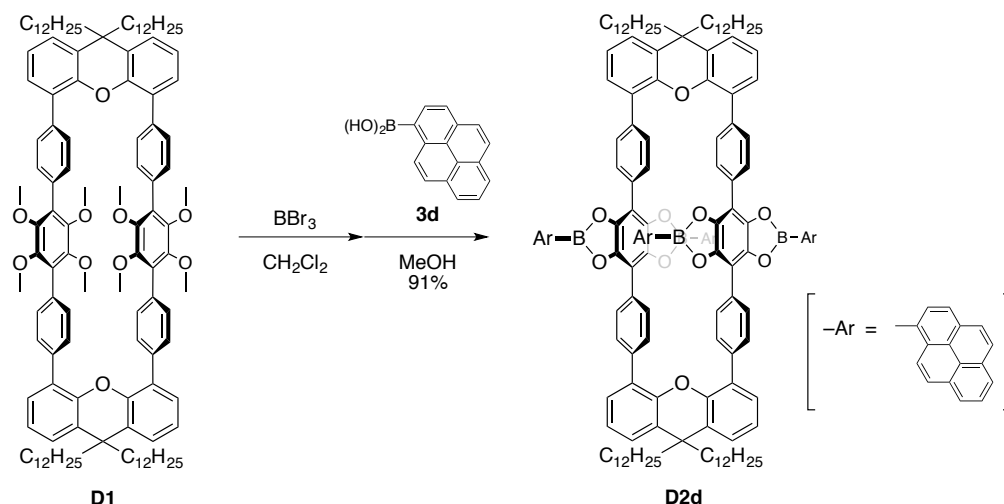

$BBr_3$  in  $CH_2Cl_2$  solution (1 M, 0.25 mL) was added dropwise to the solution of **D1** (10 mg, 5.7 mmol) in  $CH_2Cl_2$ , and the mixture was stirred at room temperature for 2 h. Compound **3d** (1.0 mmol) in  $CH_2Cl_2/MeOH$  (v/v = 1:1) was added to the solution and stirred overnight. Excess MeOH was added to the mixture to precipitate the polymer, which was collected by centrifugation. After filtration, the product was washed with MeOH and hexane. It was purified by silica gel column chromatography (hexane/ $CHCl_3$  = 1:1,  $R_f$  = 0.5) to afford **D2d** as a yellow powder (13 mg, 5.2 mmol, 91%).  $^1H$  NMR (400 MHz,  $CDCl_3$ ):  $\delta$  (ppm) 8.56 (d,  $J$  = 9.0 Hz, 4 H), 8.22 (d,  $J$  = 8.0 Hz, 8 H), 7.98 (d,  $J$  = 7.6 Hz, 4 H), 7.80 (d,  $J$  = 7.3 Hz, 4 H), 7.70 (d,  $J$  = 9.0 Hz, 4 H), 7.65 (d,  $J$  = 8.0 Hz, 8 H), 7.59 (t,  $J$  = 7.5 Hz, 4 H), 7.52 (d,  $J$  = 7.6 Hz, 4 H), 7.47 (d,  $J$  = 7.6 Hz, 4 H), 7.37 (d,  $J$  = 7.0 Hz, 4 H), 7.21 (t,  $J$  = 8.4 Hz, 8 H), 7.00 (d,  $J$  = 8.8 Hz, 4 H), 2.19 (m, 8 H), 1.36 (m, 80 H), 0.88 (t,  $J$  = 6.7 Hz, 12 H).  $^{13}C$  NMR (100 MHz,  $CDCl_3$ ):  $\delta$  (ppm) 149.1, 141.1, 137.6, 135.5, 133.2, 130.4, 130.2, 130.0, 129.6, 129.2, 127.8, 126.5, 126.0, 125.0, 124.8, 123.5, 123.2, 122.9, 111.2, 44.9, 43.0, 32.0, 31.6, 30.3, 29.9, 29.8, 29.5, 25.0, 22.7, 14.2. MS (APCI)  $m/z$ : 2480.2561 (calcd for  $C_{174}H_{164}B_4O_{10}$ ,  $[M + Na]^+$  2480.2594).

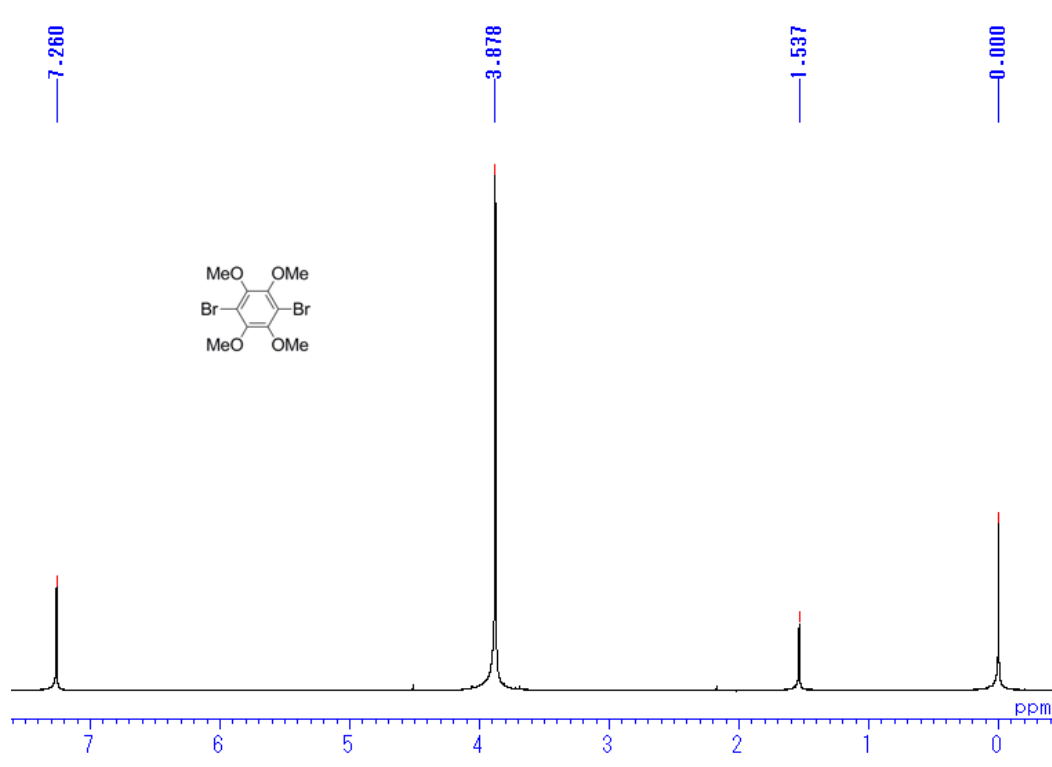

**Figure S1.**  $^1\text{H}$  NMR spectrum of **S1**, 400 MHz,  $\text{CDCl}_3$ .

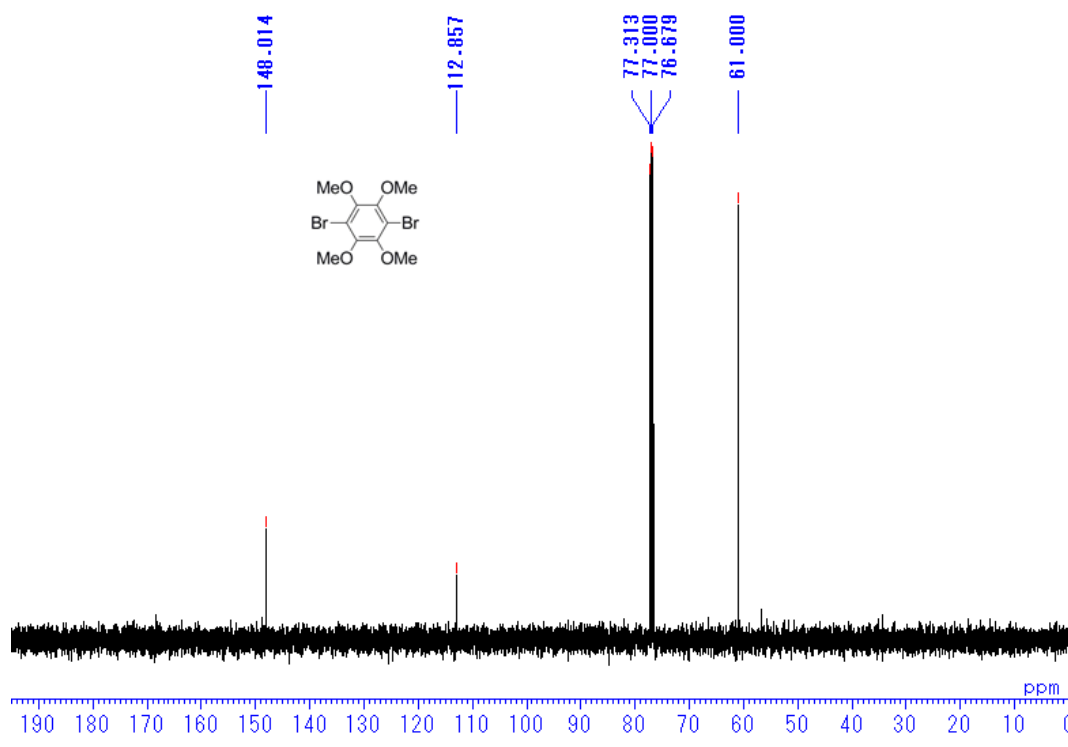

**Figure S2.**  $^{13}\text{C}$  NMR spectrum of **S1**, 100 MHz,  $\text{CDCl}_3$ .

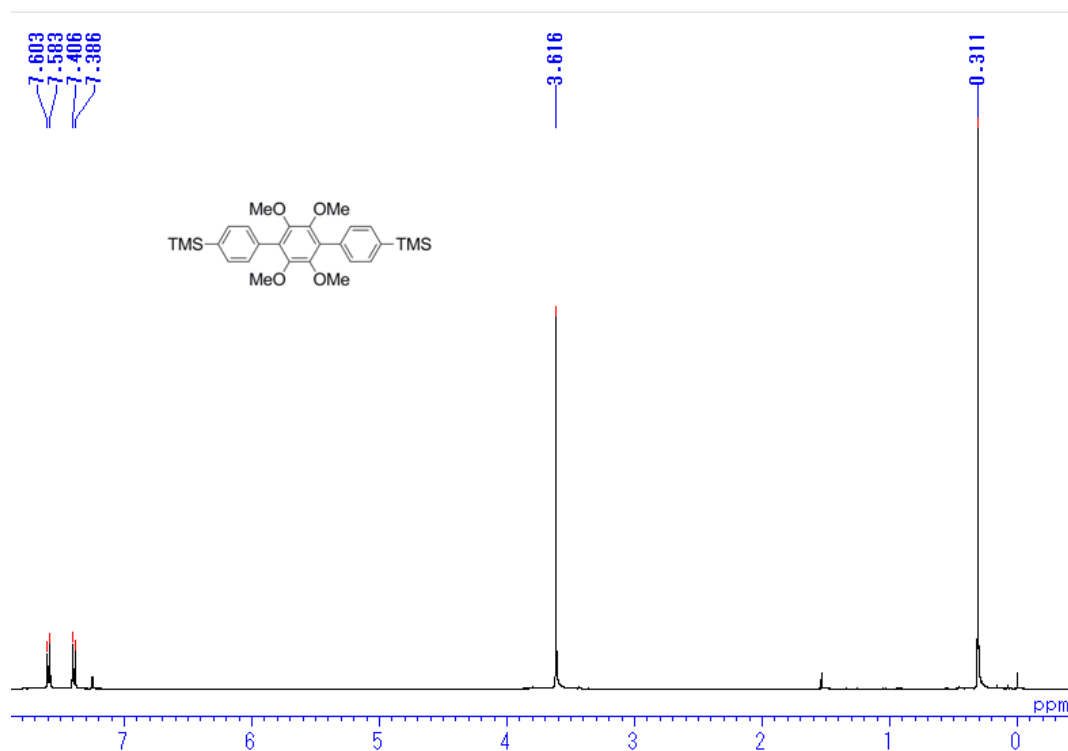

Figure S3. <sup>1</sup>H NMR spectrum of S2, 400 MHz, CDCl<sub>3</sub>.

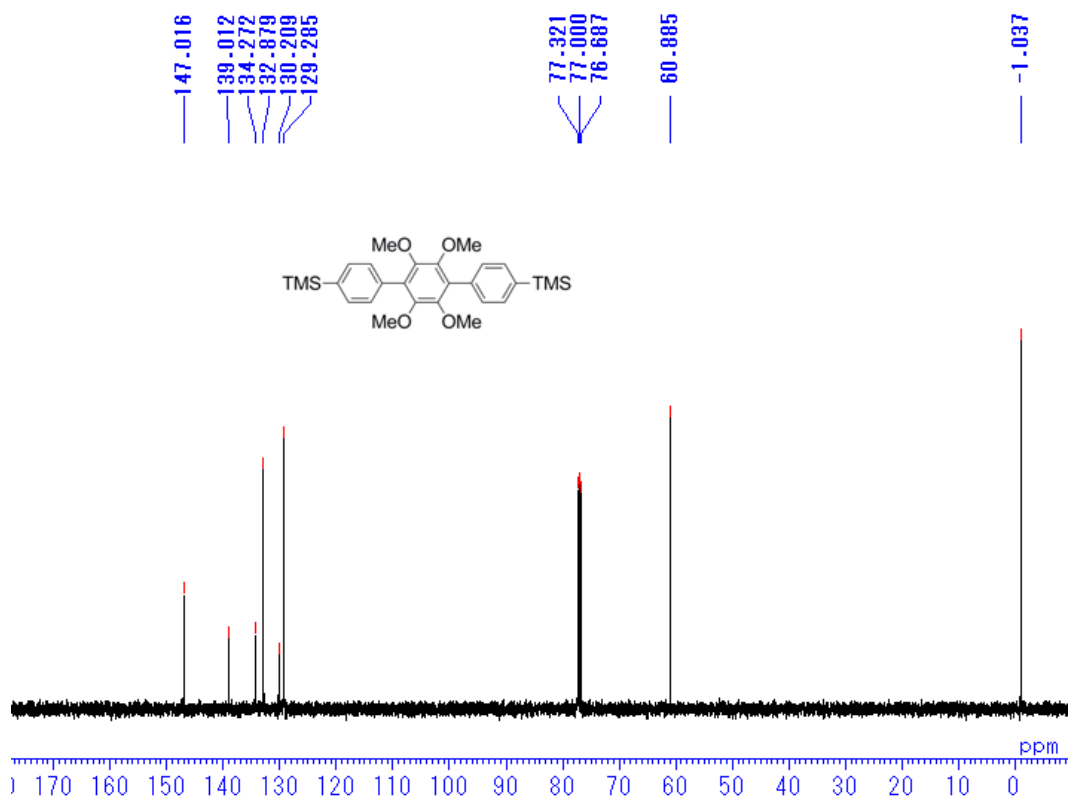

Figure S4. <sup>13</sup>C NMR spectrum of S2, 100 MHz, CDCl<sub>3</sub>.



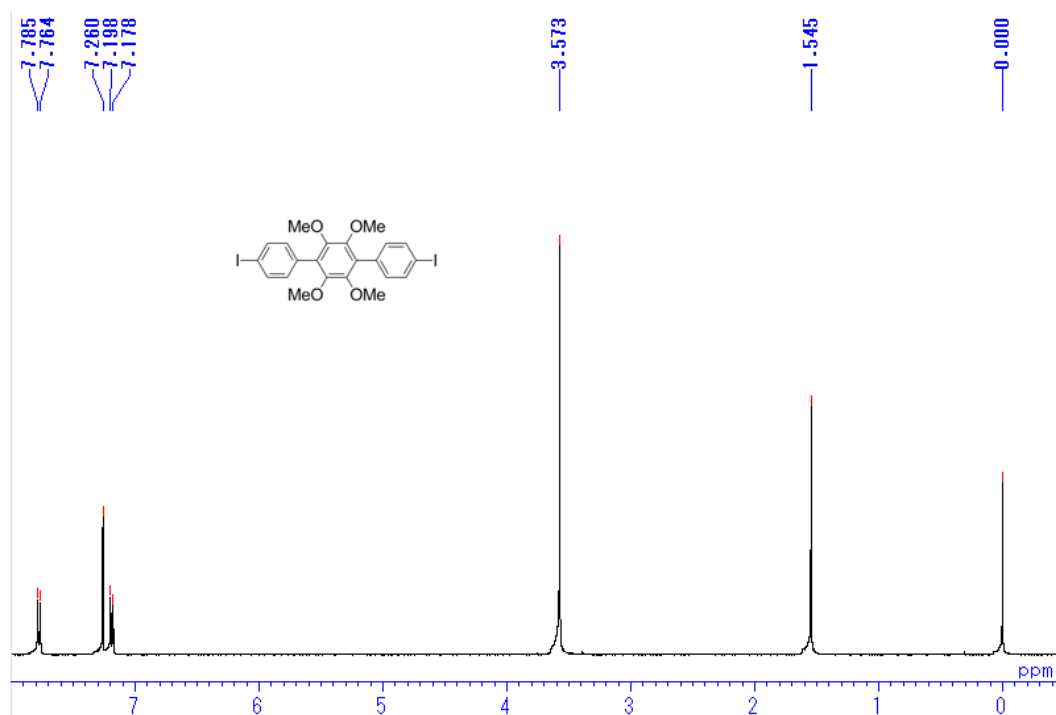

**Figure S5.**  $^1\text{H}$  NMR spectrum of **1**, 400 MHz,  $\text{CDCl}_3$ .

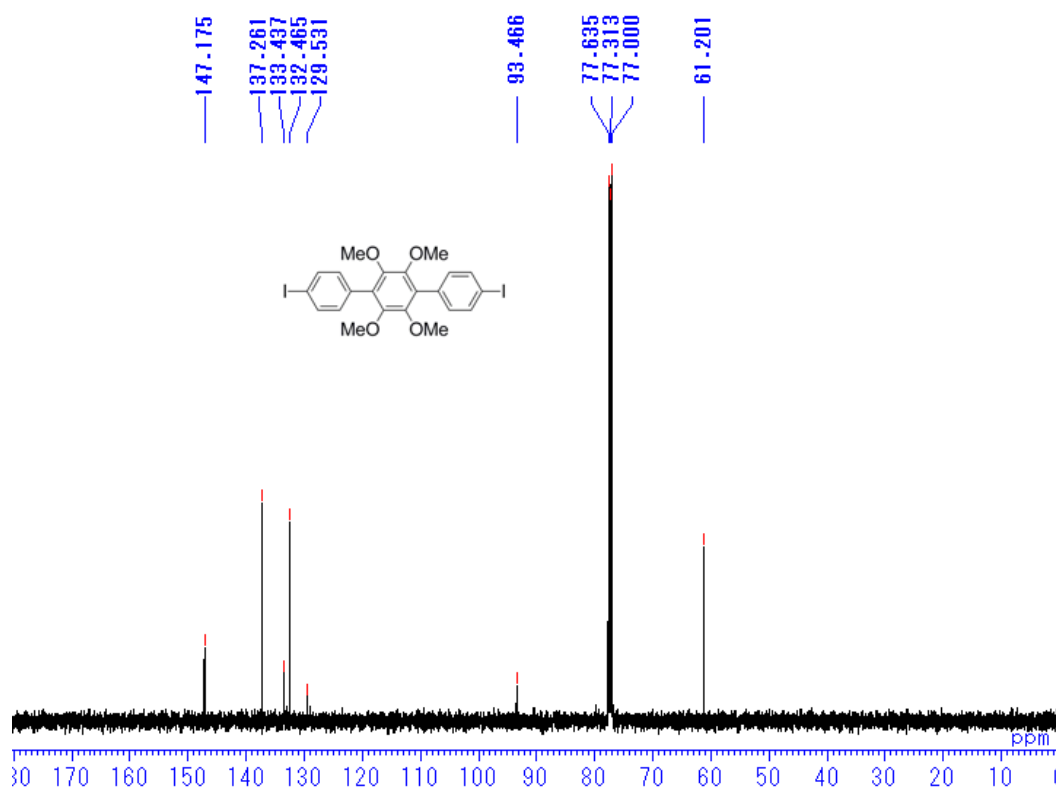

**Figure S6.**  $^{13}\text{C}$  NMR spectrum of **1**, 100 MHz,  $\text{CDCl}_3$ .

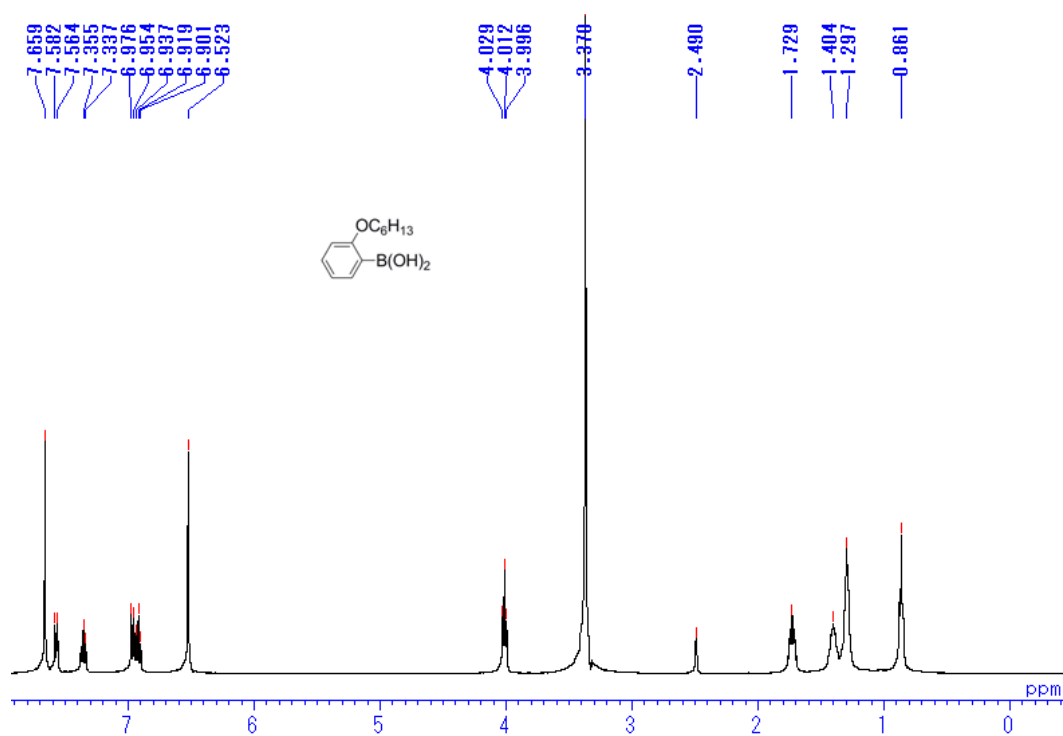

Figure S7. <sup>1</sup>H NMR spectrum of S3, 400 MHz, DMSO-*d*<sub>6</sub>.

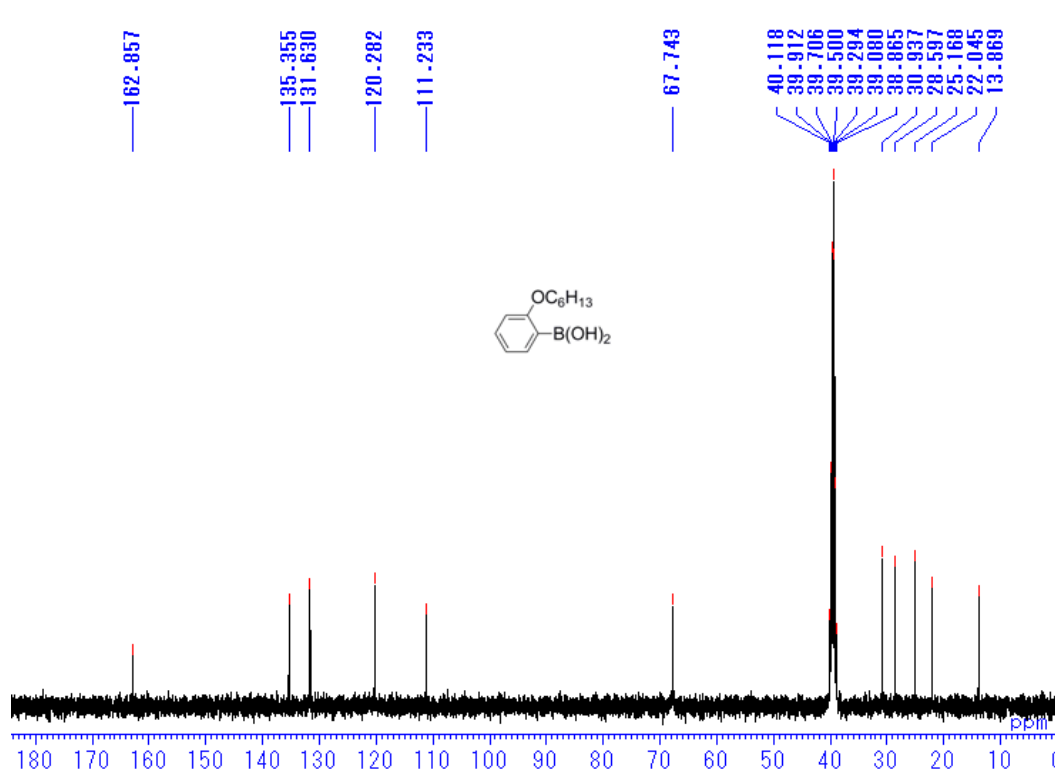

Figure S8. <sup>13</sup>C NMR spectrum of S3, 100 MHz, DMSO-*d*<sub>6</sub>.

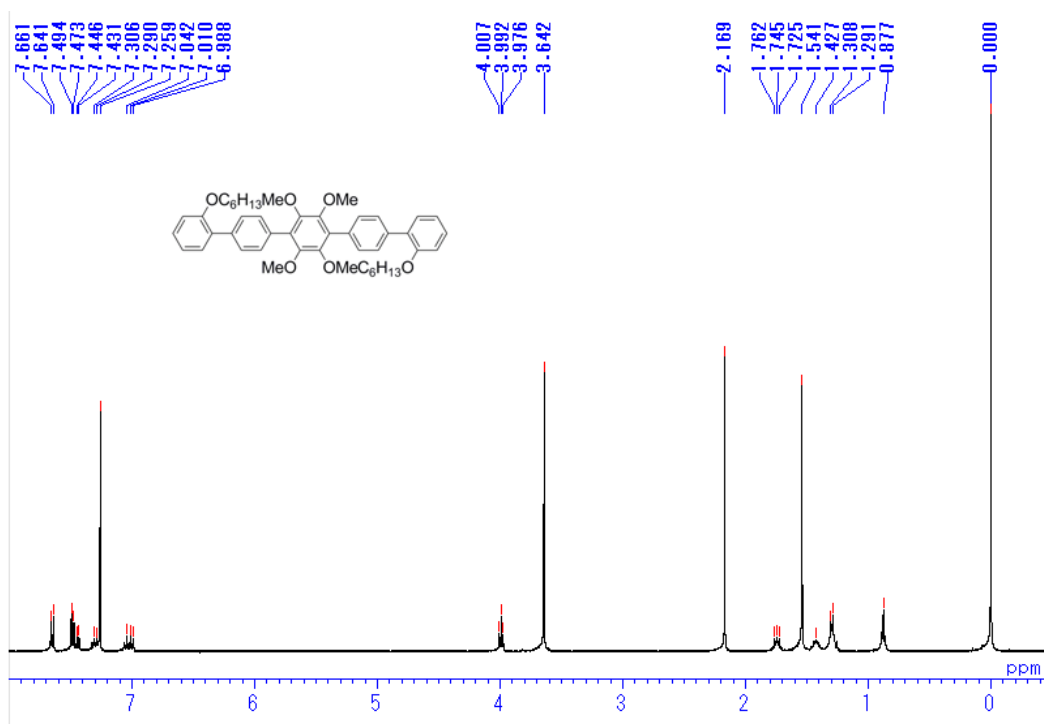

Figure S9. <sup>1</sup>H NMR spectrum of M1, 400 MHz, CDCl<sub>3</sub>.

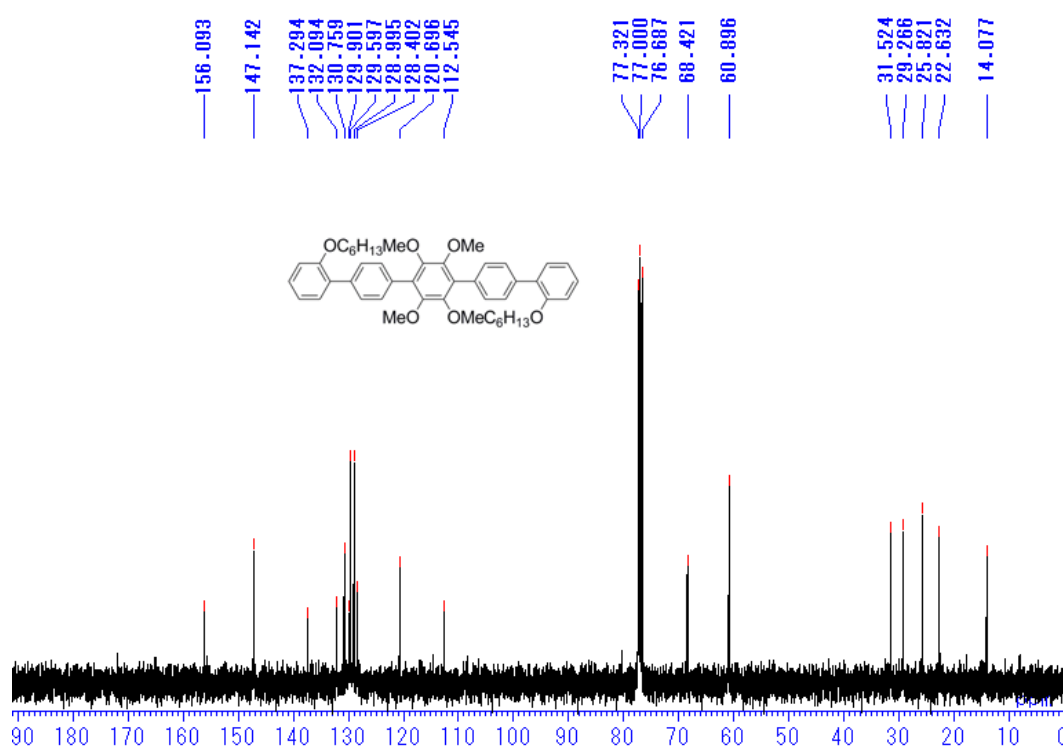

Figure S10. <sup>13</sup>C NMR spectrum of M1, 100 MHz, CDCl<sub>3</sub>.

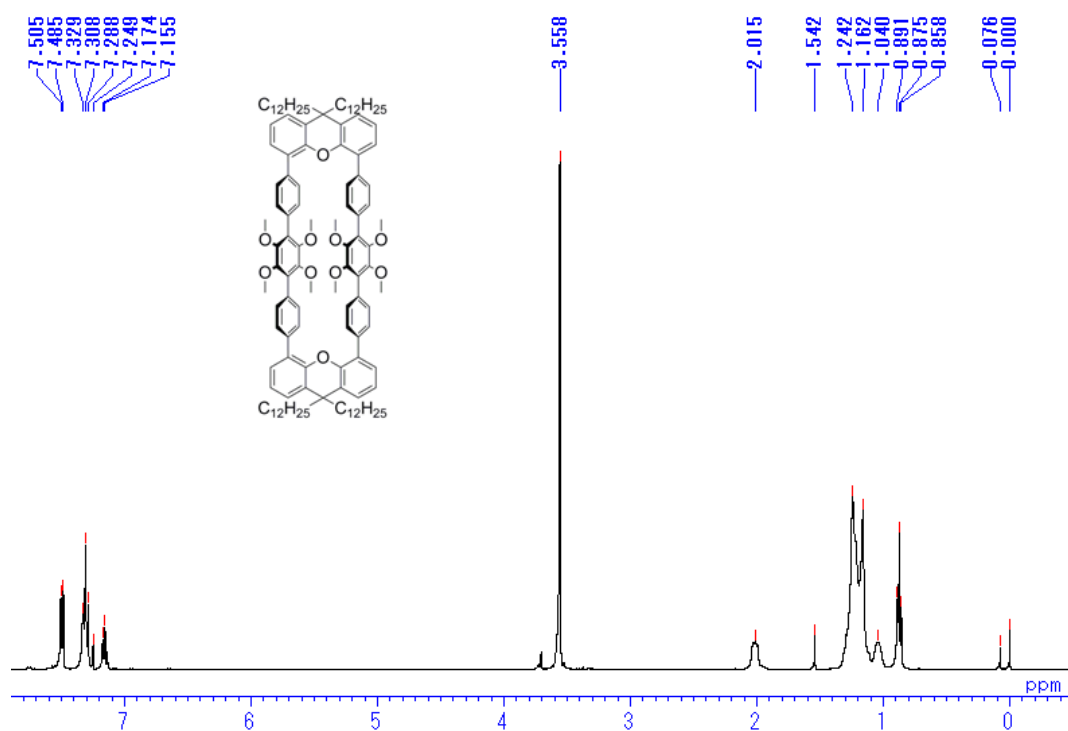

Figure S11. <sup>1</sup>H NMR spectrum of D1, 400 MHz, CDCl<sub>3</sub>.

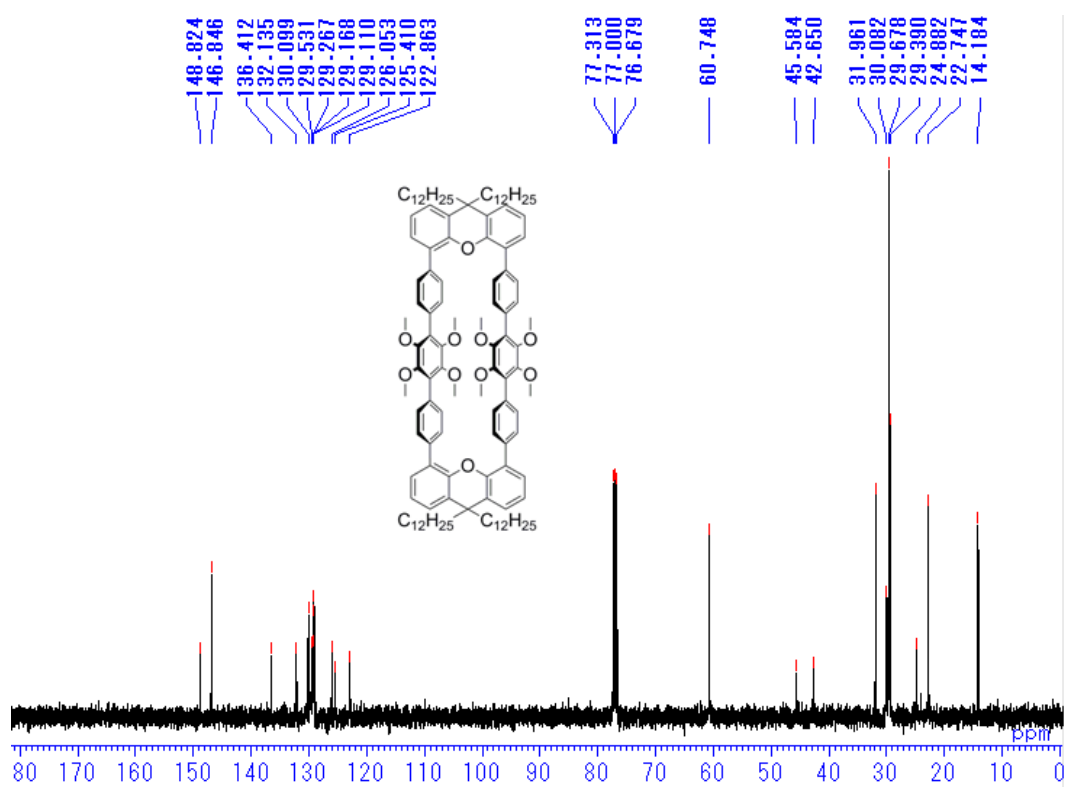

Figure S12. <sup>13</sup>C NMR spectrum of D1, 100 MHz, CDCl<sub>3</sub>.

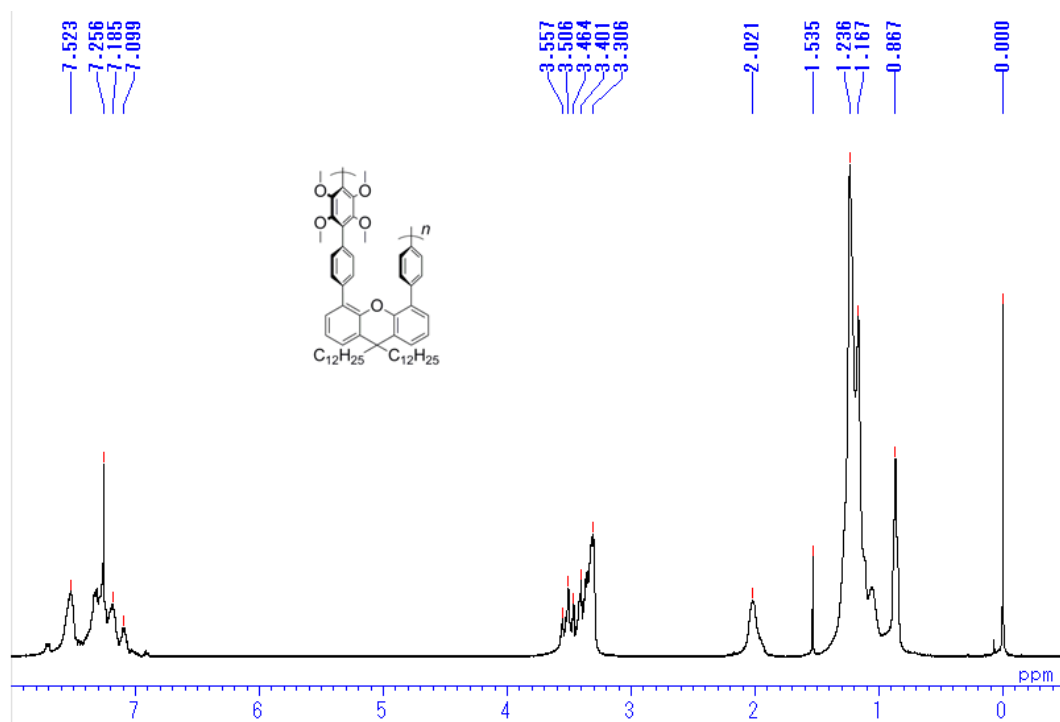

Figure S13.  $^1\text{H}$  NMR spectrum of P1, 400 MHz,  $\text{CDCl}_3$ .

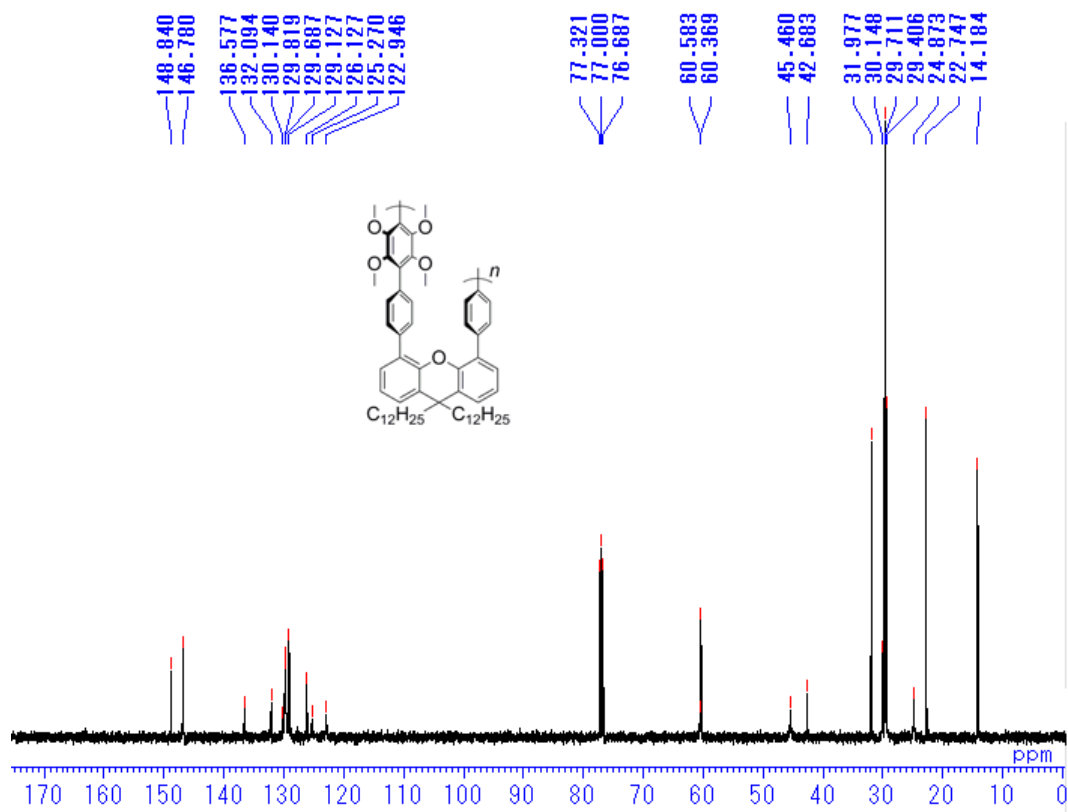

Figure S14.  $^{13}\text{C}$  NMR spectrum of P1, 100 MHz,  $\text{CDCl}_3$ .

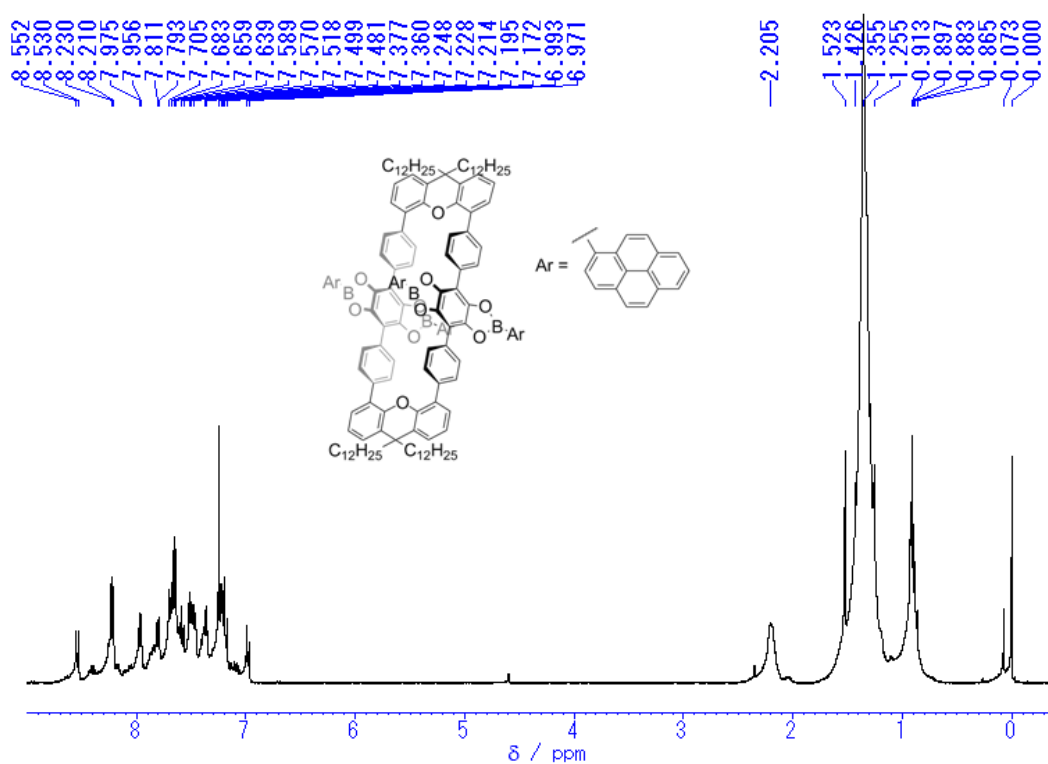

Figure S15. <sup>1</sup>H NMR spectrum of D2d, 400 MHz, CDCl<sub>3</sub>.

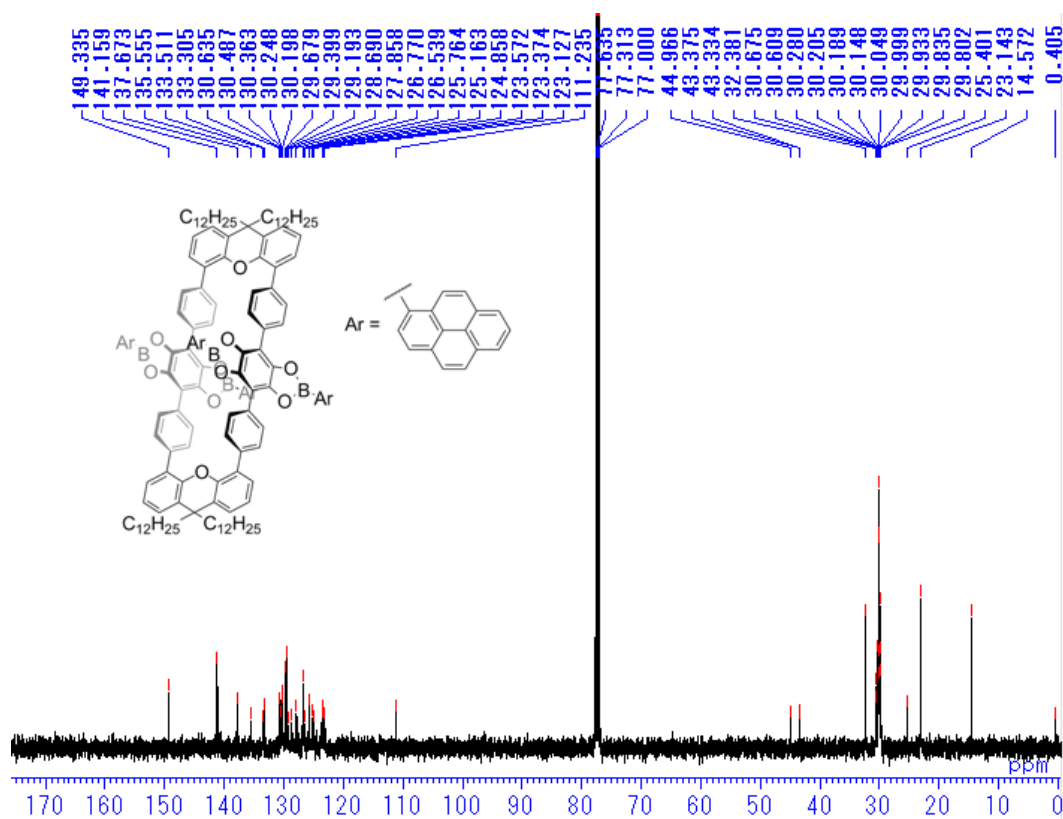

Figure S16. <sup>13</sup>C NMR spectrum of D2d, 100 MHz, CDCl<sub>3</sub>.

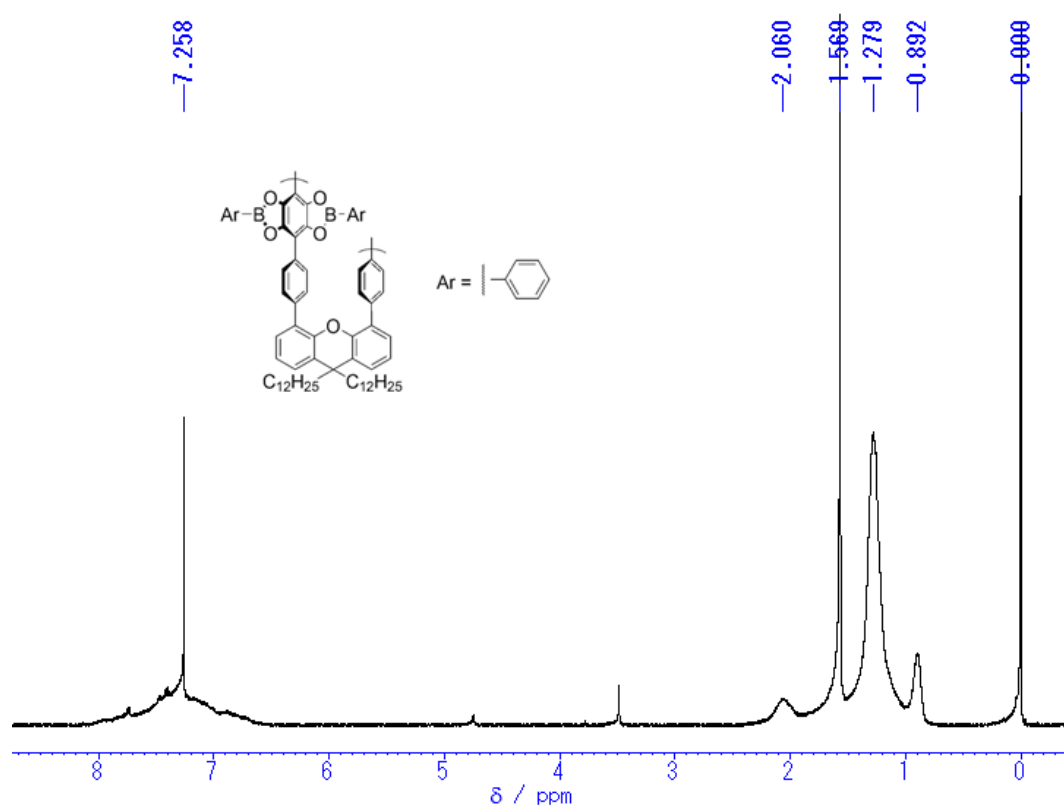

Figure S17. <sup>1</sup>H NMR spectrum of P2a, 400 MHz, CDCl<sub>3</sub>.

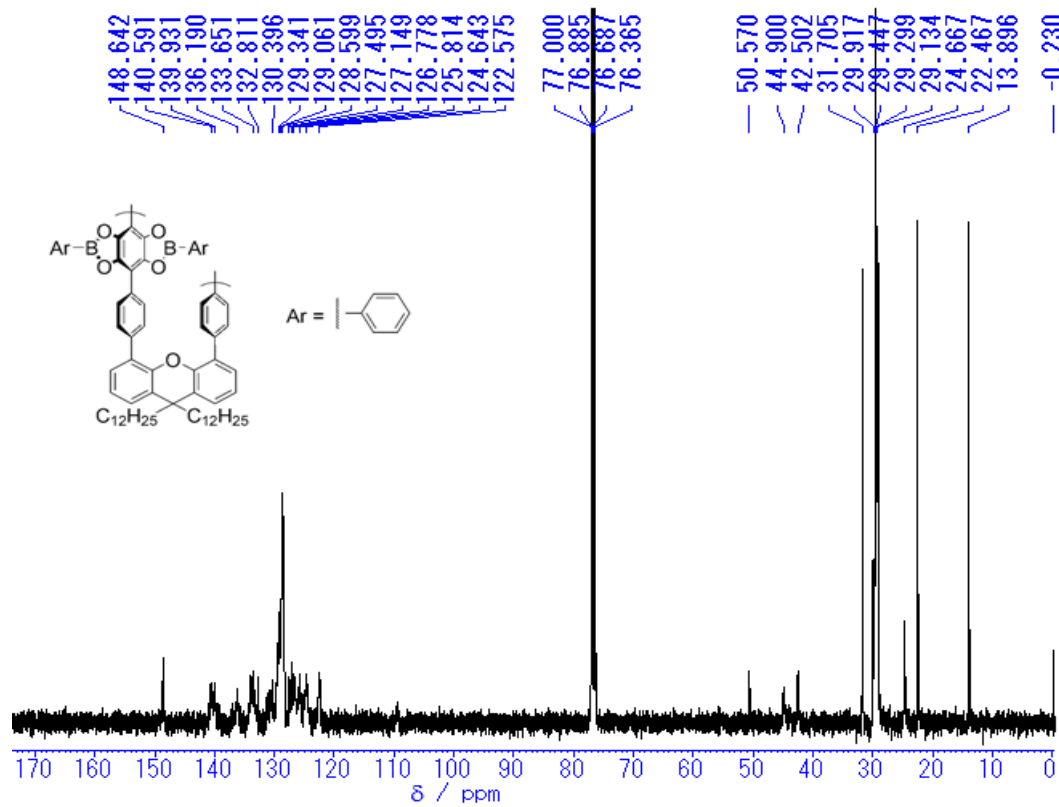

Figure S18. <sup>13</sup>C NMR spectrum of P2a, 100 MHz, CDCl<sub>3</sub>.

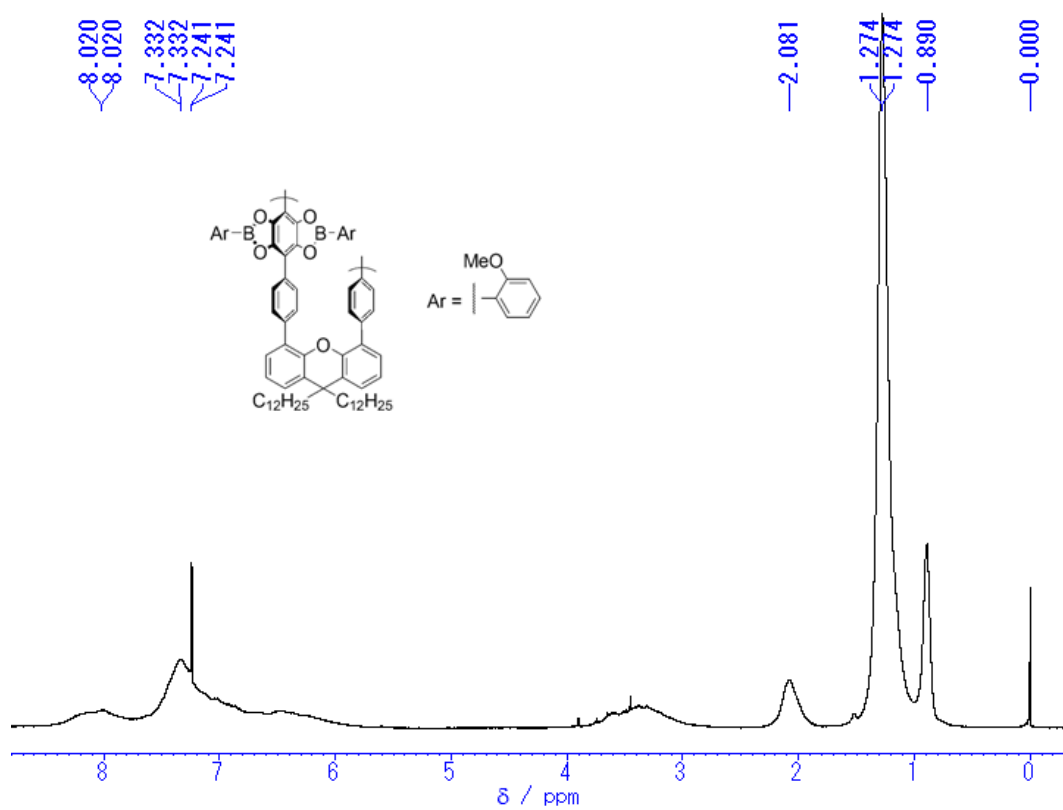

Figure S19. <sup>1</sup>H NMR spectrum of P2b, 400 MHz, CDCl<sub>3</sub>.

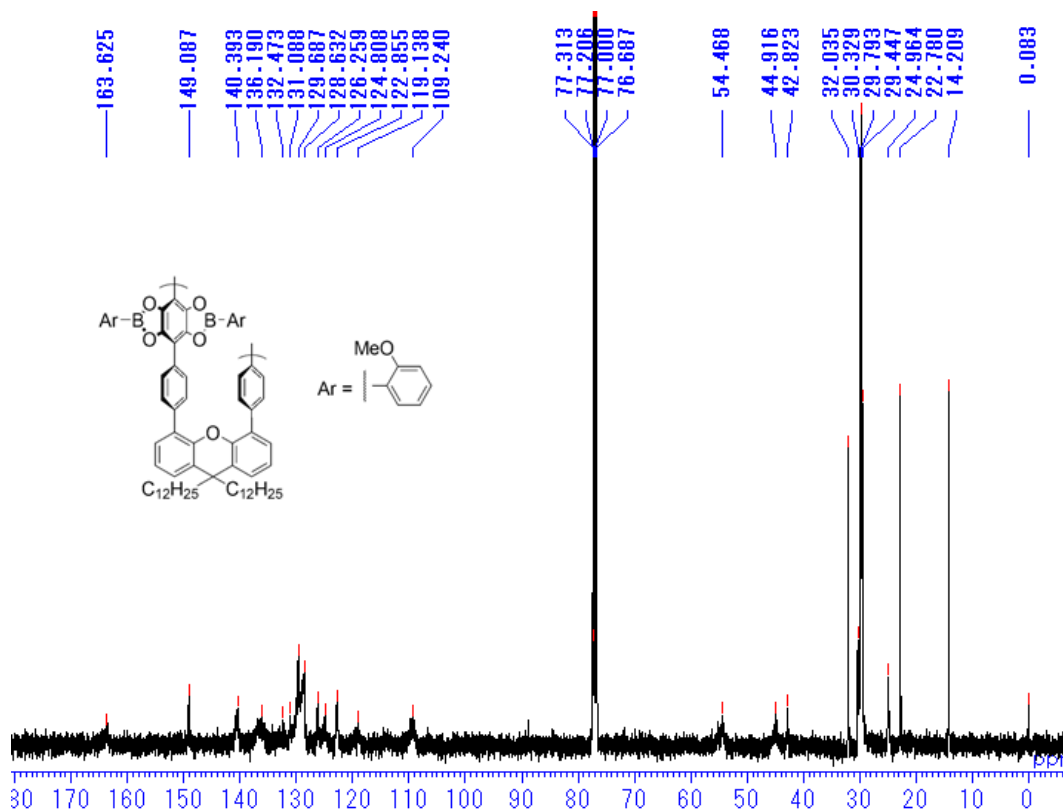

Figure S20. <sup>13</sup>C NMR spectrum of P2b, 100 MHz, CDCl<sub>3</sub>.



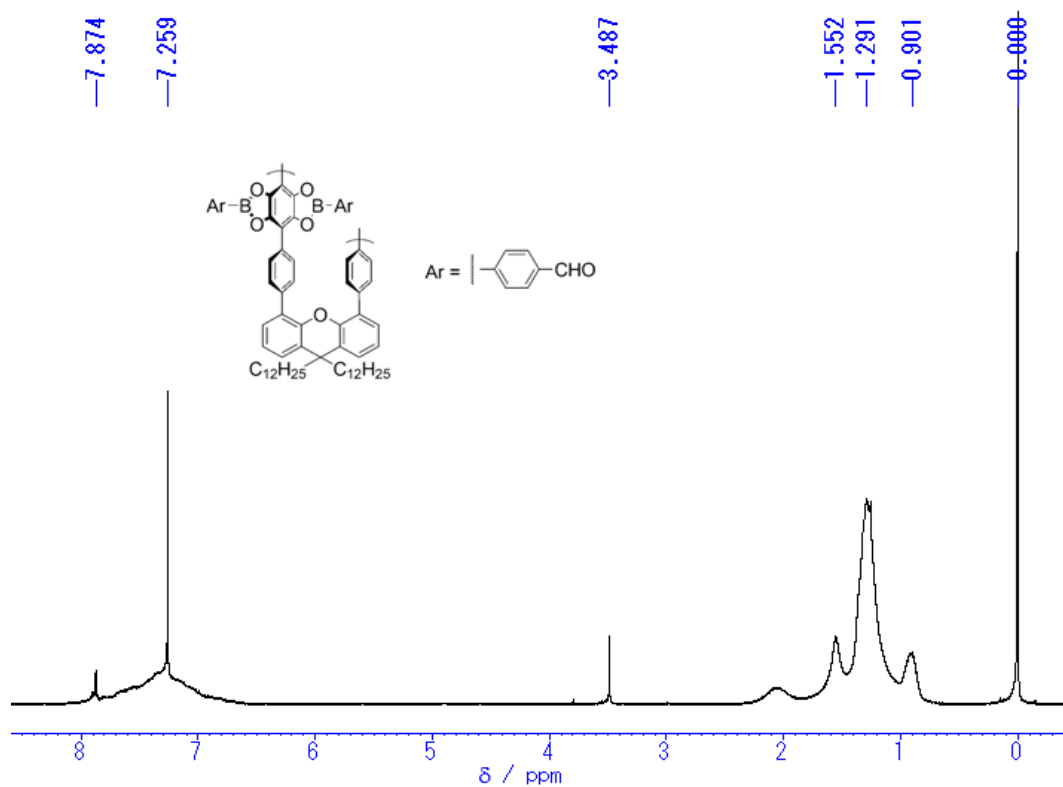

Figure S21. <sup>1</sup>H NMR spectrum of P2c, 400 MHz, CDCl<sub>3</sub>.

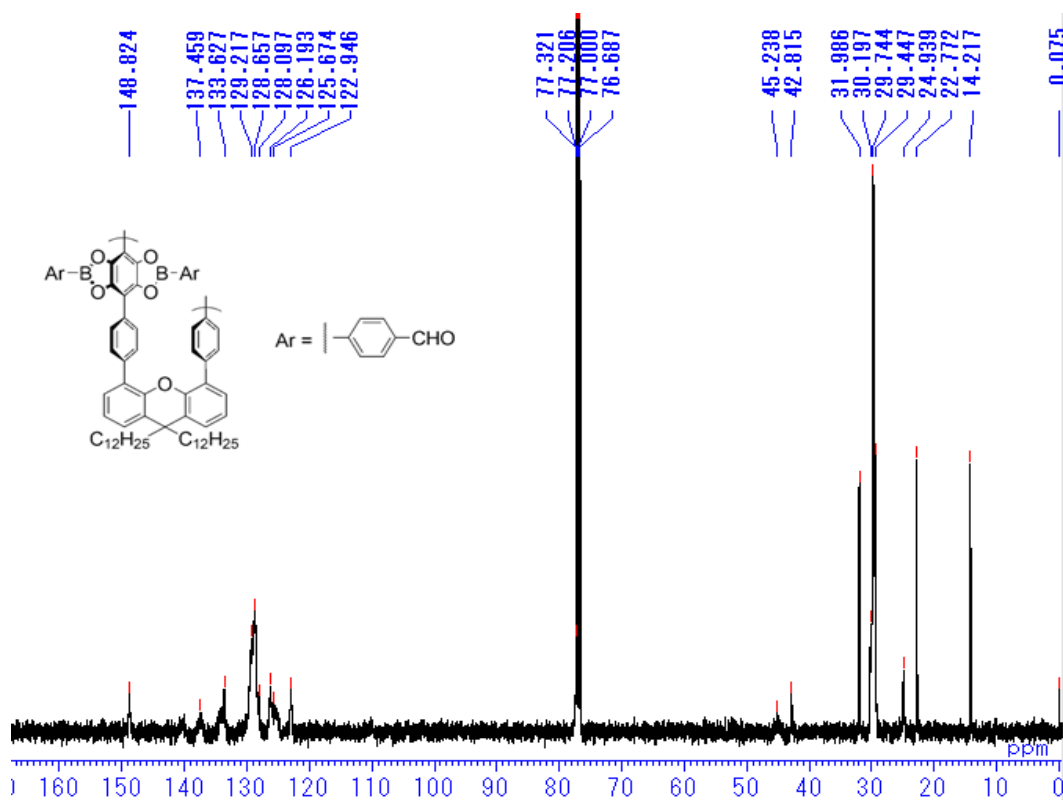

Figure S22. <sup>13</sup>C NMR spectrum of P2c, 100 MHz, CDCl<sub>3</sub>.

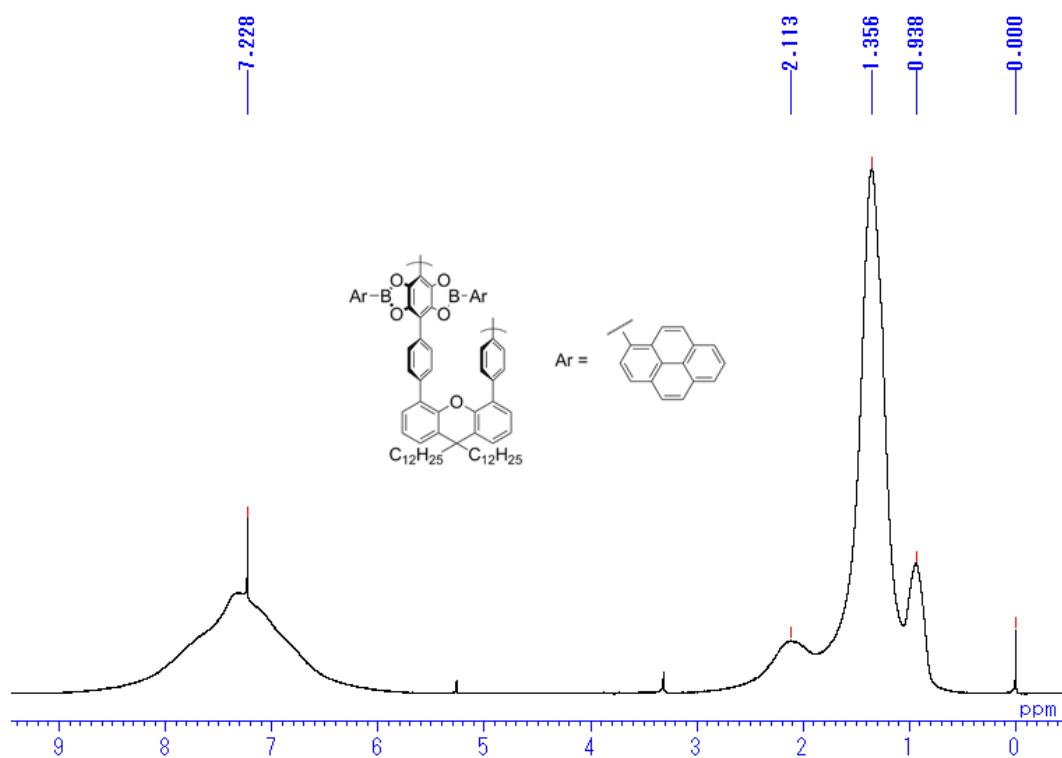

Figure S23.  $^1\text{H}$  NMR spectrum of **P2d**, 400 MHz,  $\text{CDCl}_3$ .

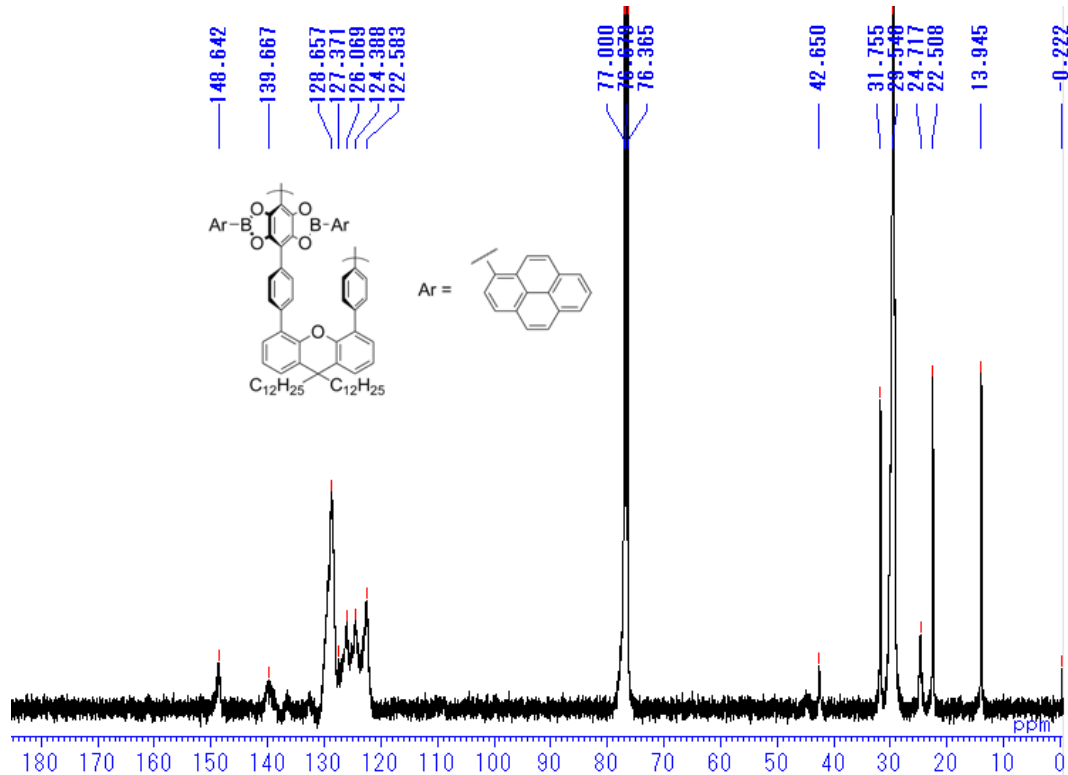

Figure S24.  $^{13}\text{C}$  NMR spectrum of **P2d**, 100 MHz,  $\text{CDCl}_3$ .

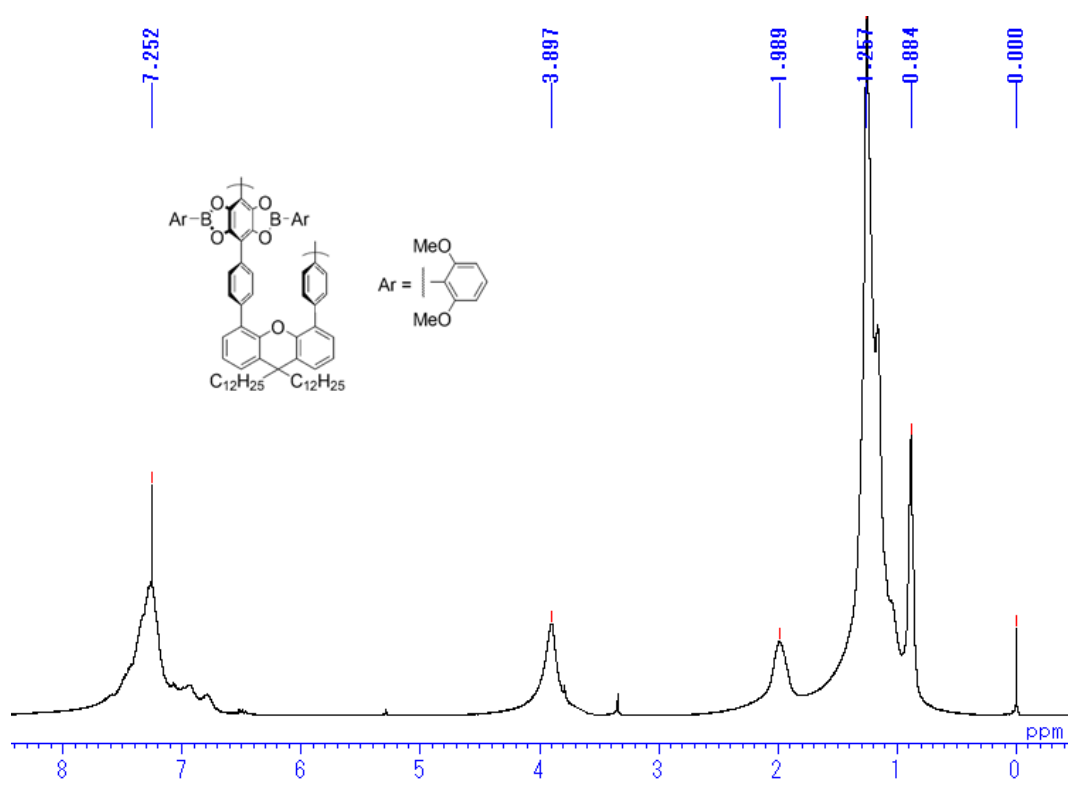

Figure S25. <sup>1</sup>H NMR spectrum of P2e, 400 MHz, CDCl<sub>3</sub>.

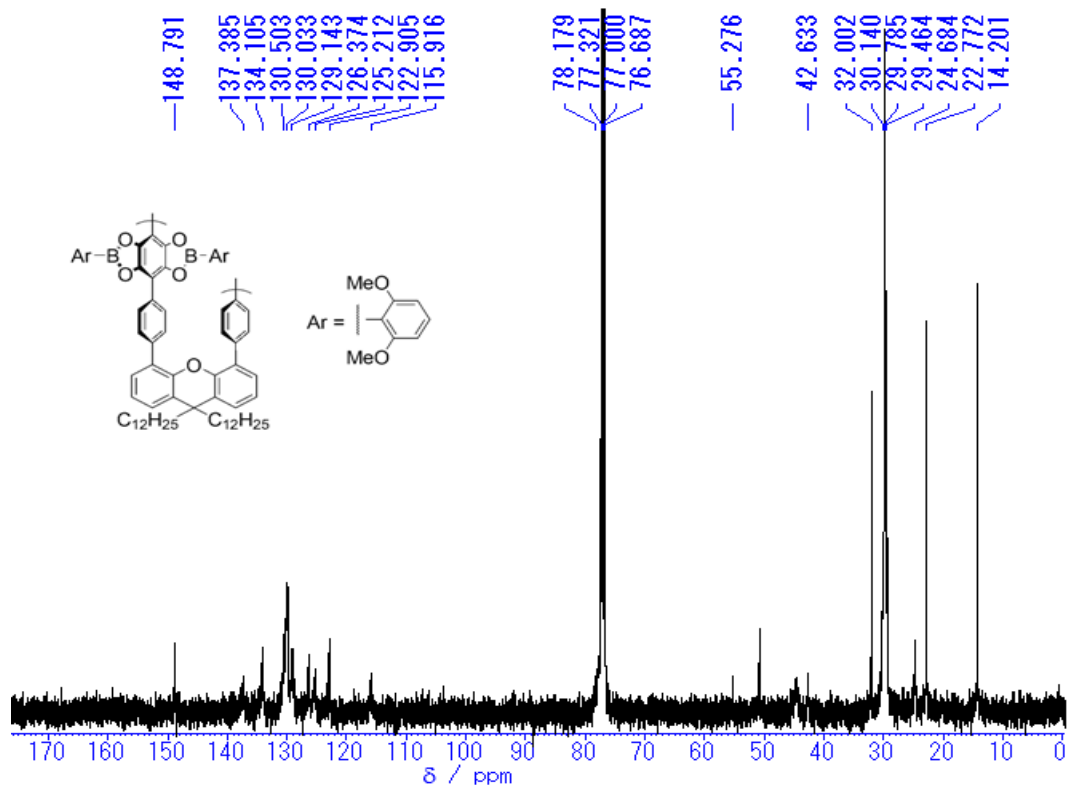

Figure S26. <sup>13</sup>C NMR spectrum of P2e, 100 MHz, CDCl<sub>3</sub>.

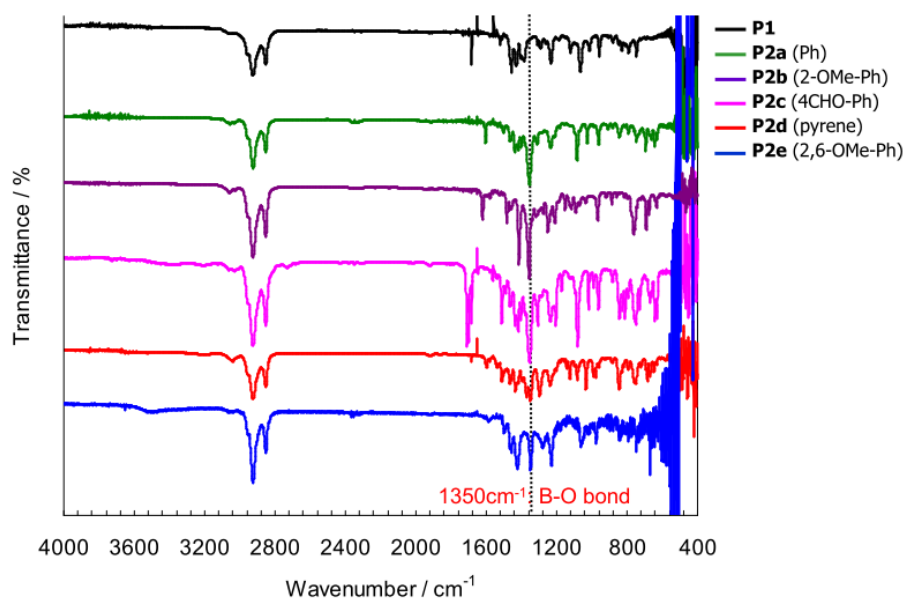

**Figure S27.** FT-IR spectra of polymers **P1** and **P2a-e** (film on KBr).

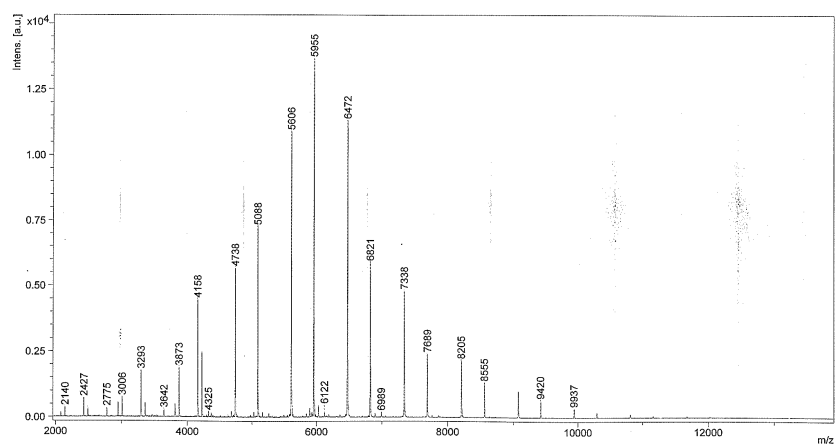

**Figure S28.** MALDI-TOF-Mass spectrum of **P1** using DCTB as a matrix.

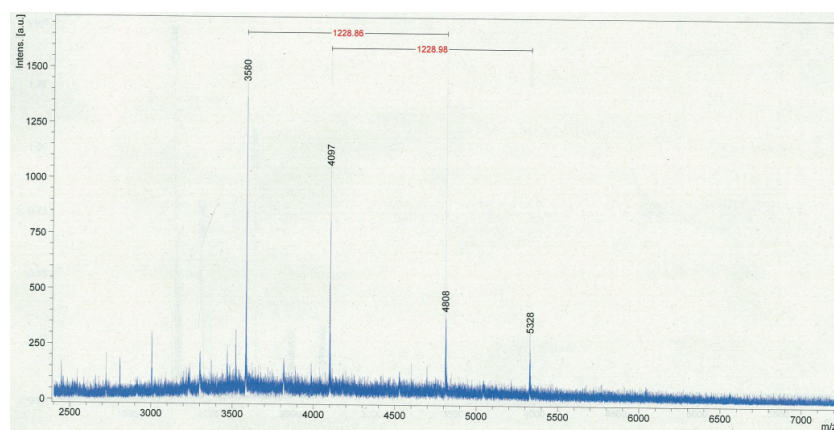

**Figure S29.** MALDI-TOF-Mass spectrum of **P2d** using DCTB as a matrix.

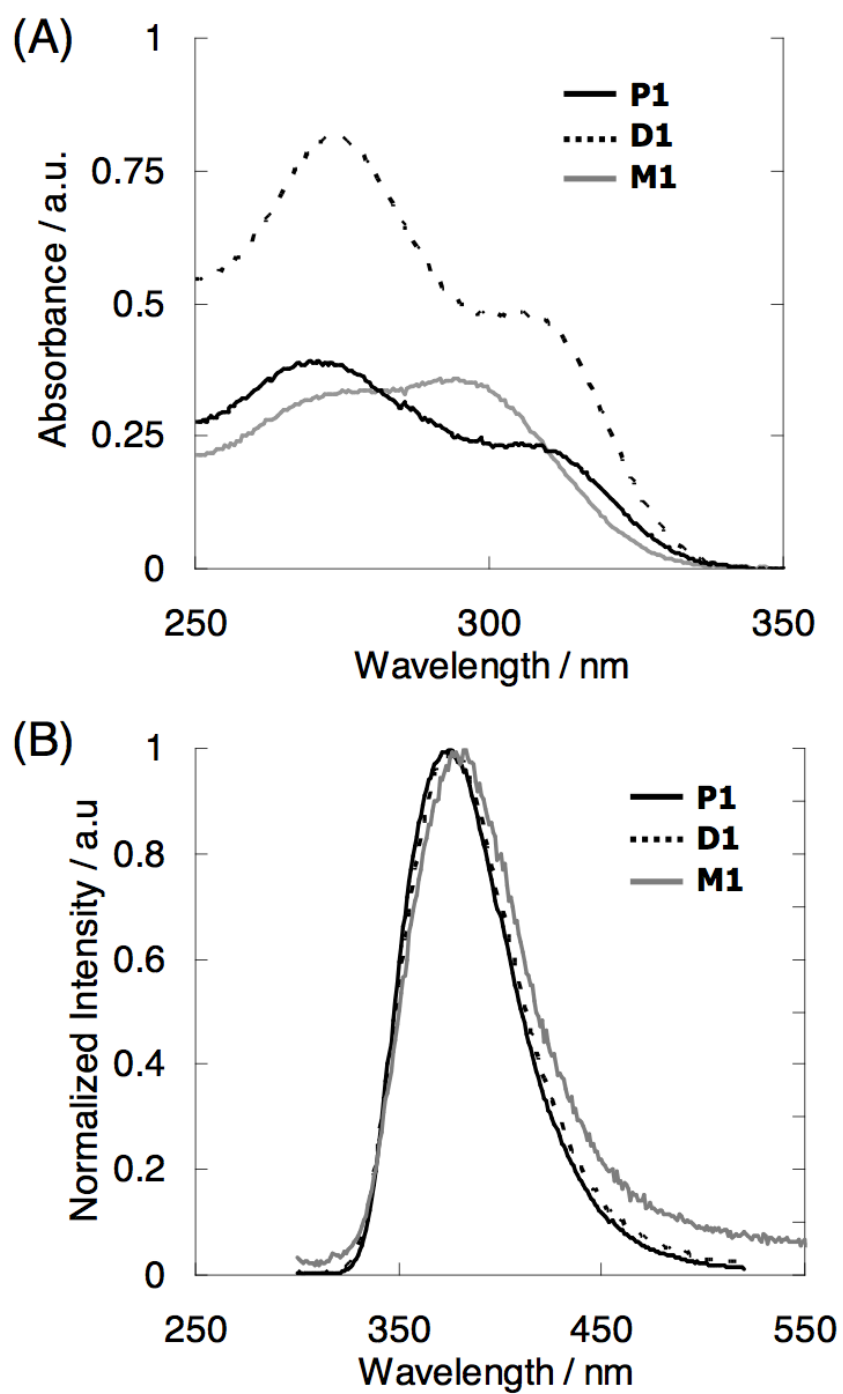

**Figure S30.** (A) UV-vis absorption spectra of **M1**, **D1**, and **P1** in CHCl<sub>3</sub> ( $1.0 \times 10^{-5}$  M). (B) Fluorescence emission spectra of **M1**, **D1**, and **P1** in CHCl<sub>3</sub> ( $1.0 \times 10^{-5}$  M), excited at each absorption maximum.

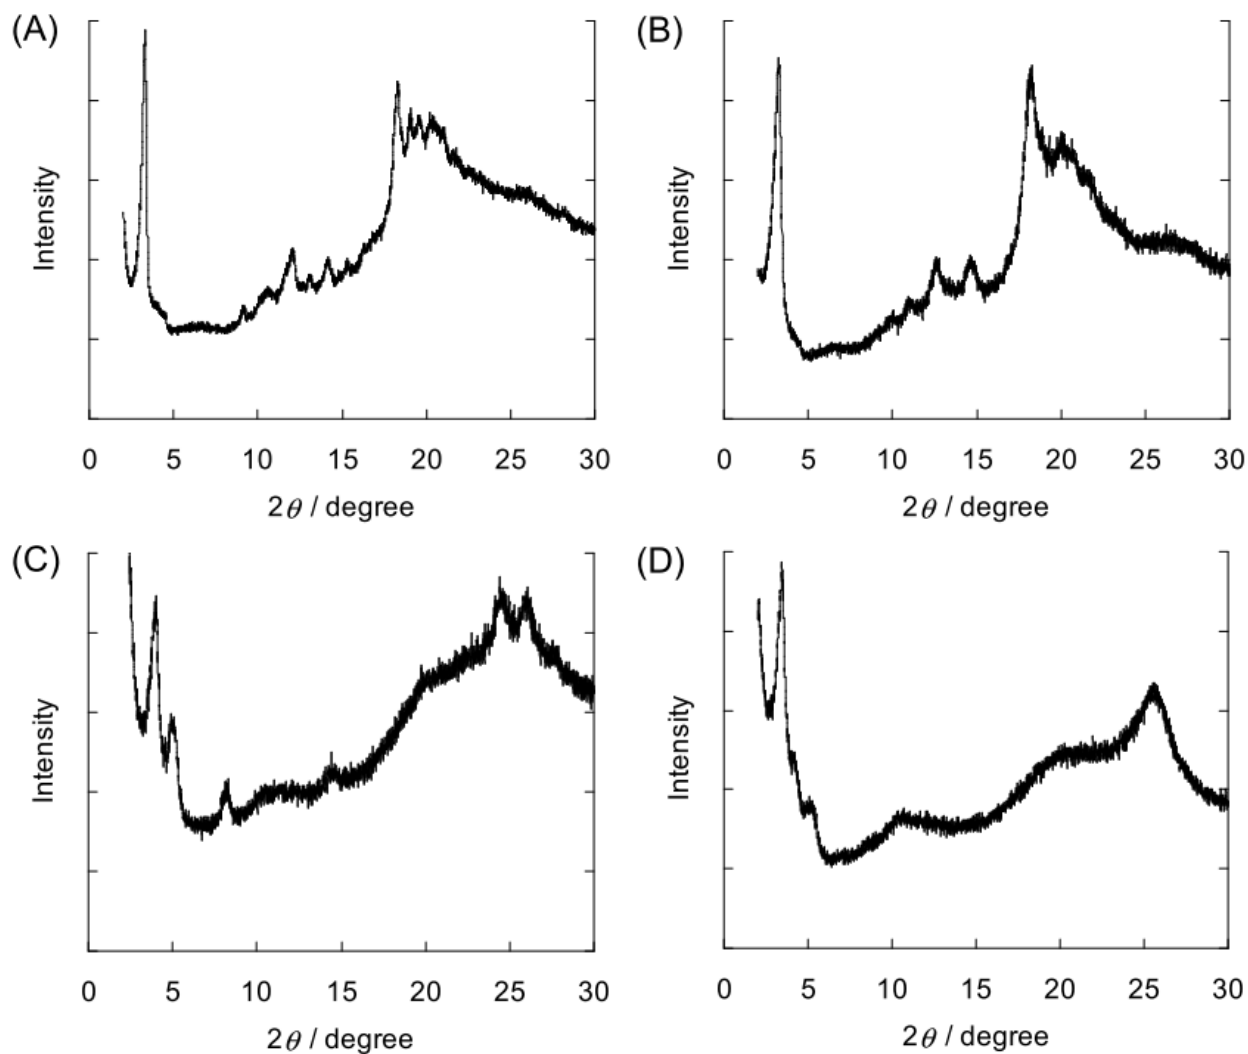

**Figure S31.** X-ray powder diffraction patterns of (A) **D1**, (B) **P1**, (C) **D2d**, and (D) **P2d**.

**Table S1. Powder X-ray Diffraction results**

| Compounds  | observed peaks / Å  |                  |                              |
|------------|---------------------|------------------|------------------------------|
| <b>D1</b>  | 26.67               | 9.64, 8.43, 7.34 | 6.72, 6.22, 4.84, 4.66, 4.54 |
| <b>P1</b>  | 27.08               | 8.09, 7.03       | 6.05, 4.88, 4.43             |
| <b>D2d</b> | 22.02, 17.45, 10.79 |                  | 6.15, 3.65, 3.42             |
| <b>P2d</b> | 25.59, 20.82, 16.79 | 8.47             | 3.49                         |

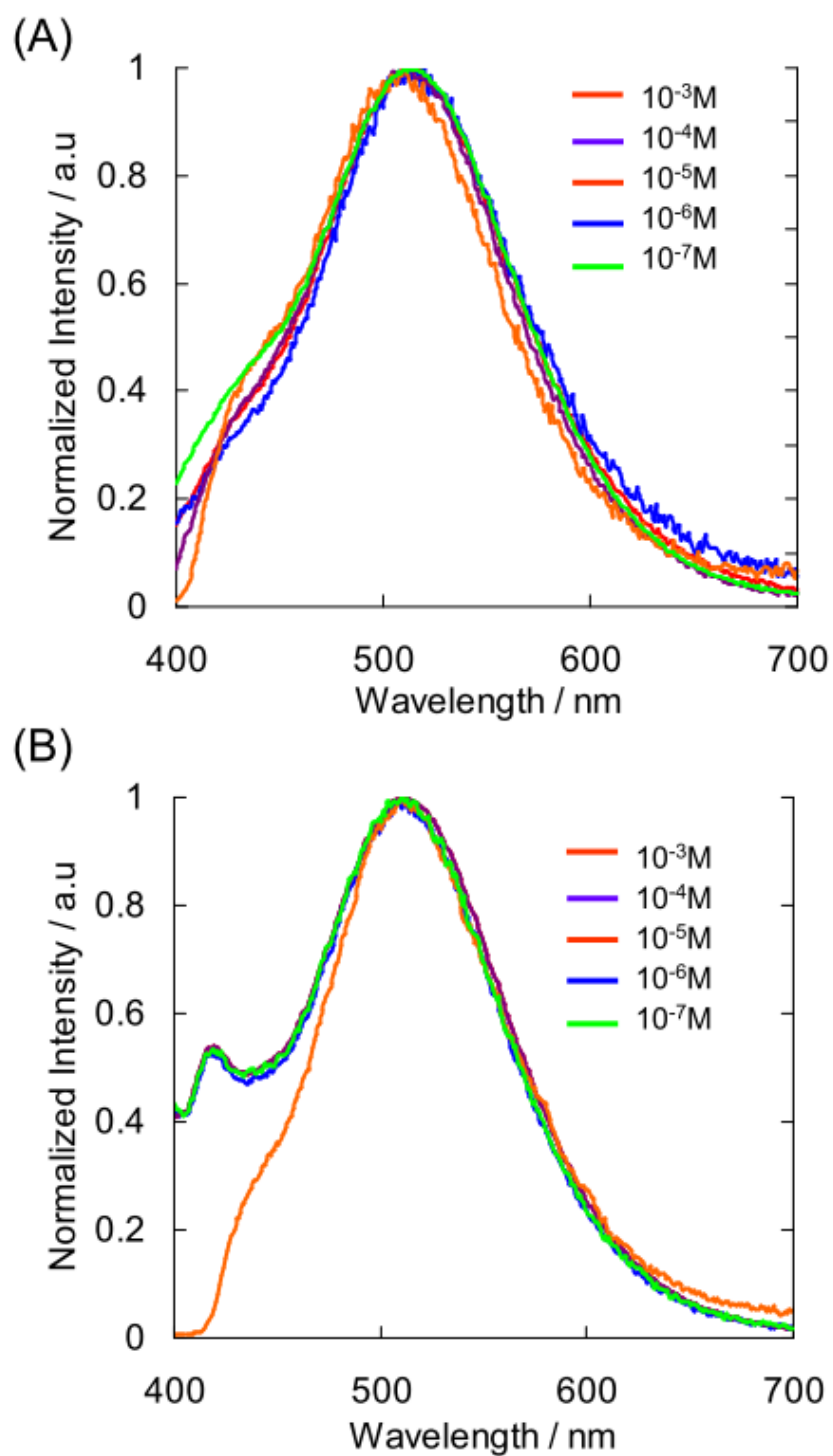

**Figure S32.** Normalized fluorescence emission spectra of (A) **P2d** and (B) **D2d** in  $\text{CHCl}_3$  ( $1.0 \times 10^{-3}$ ,  $1.0 \times 10^{-4}$ ,  $1.0 \times 10^{-5}$ ,  $1.0 \times 10^{-6}$ , and  $1.0 \times 10^{-7}$  M), excited at each absorption maximum.

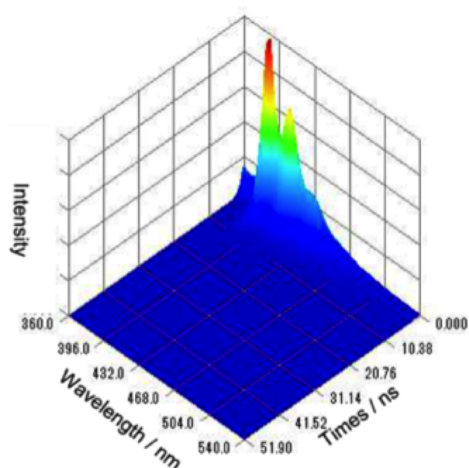

Figure S33. Time-resolved emission spectra of **M2d** in  $\text{CHCl}_3$  ( $1.0 \times 10^{-5}$  M).

(A)

(B)

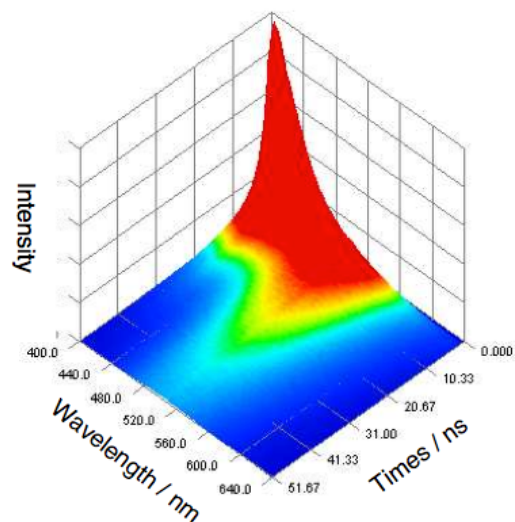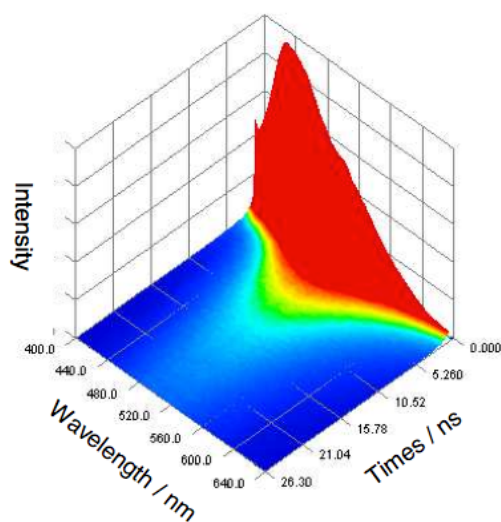

Figure S34. Time-resolved emission spectra of **D2d** (A) in  $\text{CHCl}_3$  ( $1.0 \times 10^{-5}$  M) and (B) the film.

(A)

(B)

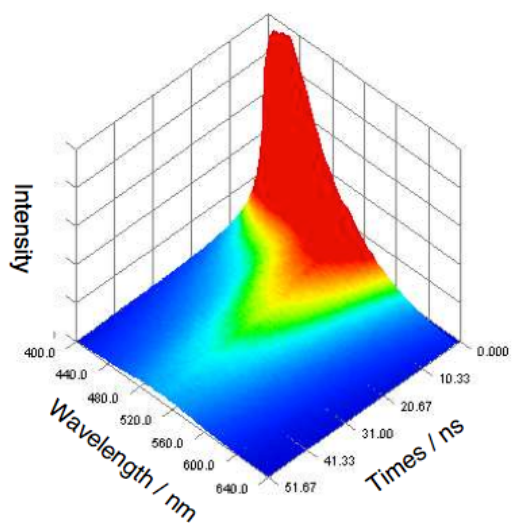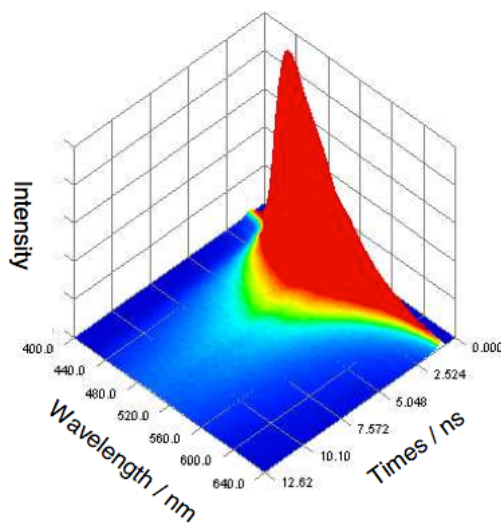

Figure S35. Time-resolved emission spectra of **P2d** (A) in  $\text{CHCl}_3$  ( $1.0 \times 10^{-5}$  M) and (B) the film.



**Table S2. Results of fluorescence decay analysis**

| Compound (observed $\lambda_{em}$ ) | $\tau$ / ns                                       | $\chi^2$ |
|-------------------------------------|---------------------------------------------------|----------|
| <b>M2d</b> (410 nm)                 | 2.4                                               | 1.24     |
| <b>D2d</b> (415 nm)                 | $\tau_1 = 1.9$ (28.3%)<br>$\tau_2 = 7.8$ (71.7%)  | 1.02     |
| <b>D2d</b> (520 nm)                 | $\tau_1 = 6.9$ (8.0%)<br>$\tau_2 = 34.5$ (92.0%)  | 1.18     |
| <b>P2d</b> (420 nm)                 | $\tau_1 = 1.5$ (25.5%)<br>$\tau_2 = 8.7$ (74.5%)  | 1.28     |
| <b>P2d</b> (520 nm)                 | $\tau_1 = 8.1$ (7.7%)<br>$\tau_2 = 34.9$ (92.3%)  | 1.21     |
| <b>P2d</b> film (520 nm)            | $\tau_1 = 2.4$ (21.0%)<br>$\tau_2 = 12.2$ (78.9%) | 1.10     |

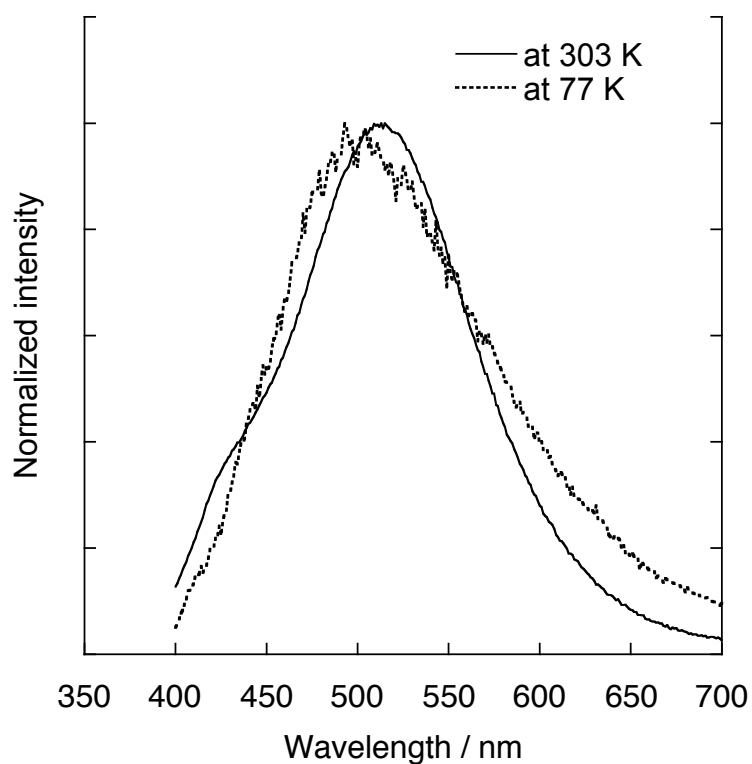

**Figure S36.** Fluorescence emission spectra of **P2d** in 2-methyltetrahydrofuran ( $1.0 \times 10^{-5}$  M) at 303 K and 77 K.

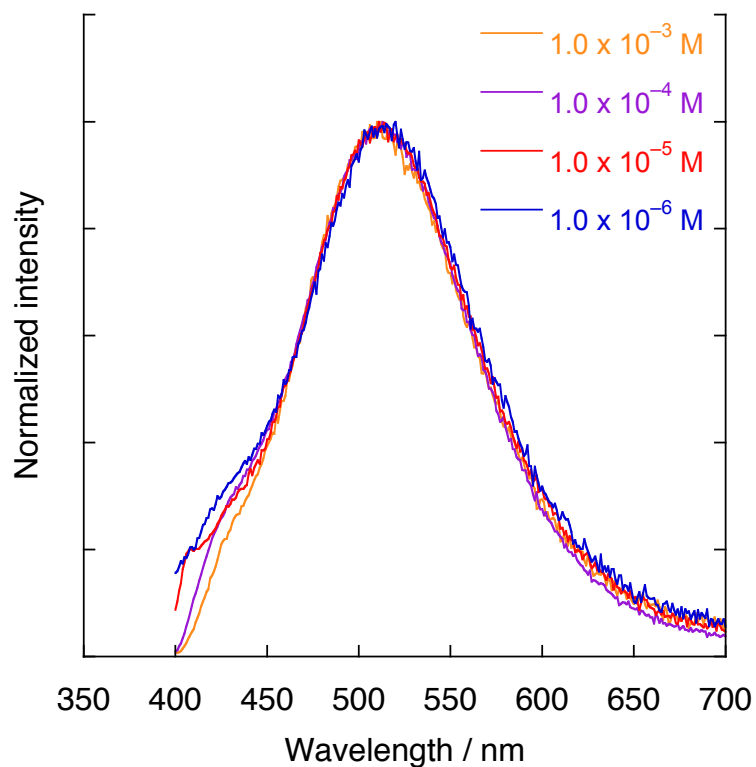

**Figure S37.** Normalized fluorescence emission spectra of **P2d** in 2-methyltetrahydrofuran ( $1.0 \times 10^{-3}$ ,  $1.0 \times 10^{-4}$ ,  $1.0 \times 10^{-5}$ , and  $1.0 \times 10^{-6}$  M), excited at each absorption maximum.
